1 **Septate junction proteins are required for egg elongation and border cell**  
2 **migration during oogenesis in *Drosophila***

3 Haifa Alhadyian<sup>1</sup>, Dania Shoaib<sup>1</sup>, and Robert E. Ward IV<sup>1,2</sup>

4 <sup>1</sup>Department of Molecular Biosciences, University of Kansas, Lawrence, Kansas 66045

5 <sup>2</sup>Current address and Corresponding Author information: Robert E. Ward IV, Department of  
6 Biology, Case Western Reserve University, 2080 Adelbert Rd, Cleveland, Ohio 44106

7 E-mail: rew130@case.edu

8 Phone: (216) 368-6707

- 9    **Running title:** SJ proteins in oogenesis
- 10
- 11
- 12    **Keywords:** Septate junctions, oogenesis, *Drosophila*, tissue morphogenesis, egg elongation

13 **Abstract**

14 Protein components of the invertebrate occluding junction - known as the septate junction (SJ) -  
15 are required for morphogenetic developmental events during embryogenesis in *Drosophila*  
16 *melanogaster*. In order to determine whether SJ proteins are similarly required for  
17 morphogenesis during other developmental stages, we investigated the localization and  
18 requirement of four representative SJ proteins during oogenesis: Contactin, Macroglobulin  
19 complement-related, Neurexin IV, and Coracle. A number of morphogenetic processes occur  
20 during oogenesis, including egg elongation, formation of dorsal appendages, and border cell  
21 migration. We found that all four SJ proteins are expressed in egg chambers throughout  
22 oogenesis, with the highest and most sustained levels in the follicular epithelium (FE). In the FE,  
23 SJ proteins localize along the lateral membrane during early and mid-oogenesis, but become  
24 enriched in an apical-lateral domain (the presumptive SJ) by stage 10b. SJ protein relocalization  
25 requires the expression of other SJ proteins, as well as rab5 and rab11 in a manner similar to SJ  
26 biogenesis in the embryo. Knocking down the expression of these SJ proteins in follicle cells  
27 throughout oogenesis results in egg elongation defects and abnormal dorsal appendages.  
28 Similarly, reducing the expression of SJ genes in the border cell cluster results in border cell  
29 migration defects. Together, these results demonstrate an essential requirement for SJ genes in  
30 morphogenesis during oogenesis, and suggests that SJ proteins may have conserved functions in  
31 epithelial morphogenesis across developmental stages.

32

33

34

## 35 **Article Summary**

36 Septate junction (SJ) proteins are essential for forming an occluding junction in epithelial tissues  
37 of *Drosophila melanogaster*, and also for morphogenetic events that occur prior to the formation  
38 of the junction during embryogenesis. Here we show that SJ proteins are expressed in the  
39 follicular epithelium of egg chambers during oogenesis and are required for morphogenetic  
40 events including egg elongation, dorsal appendages formation, and border cell migration.  
41 Additionally, the formation of SJs during oogenesis is similar to that in embryonic epithelia.

## 42 **Introduction**

43       The septate junction (hereafter referred to as SJ) provides an essential paracellular barrier to  
44 epithelial tissues in invertebrate animals (Noirot-timothee *et al.* 1978). As such, the SJ is  
45 functionally equivalent to the tight junction in vertebrate tissues, although the molecular  
46 components and ultrastructure of these junctions differ (reviewed in Izumi and Furuse 2014).  
47 Studies in *Drosophila* have identified more than 20 proteins that are required for the organization  
48 or maintenance of the SJ (Fehon *et al.* 1994; Baumgartner *et al.* 1996; Behr *et al.* 2003; Paul *et*  
49 *al.* 2003; Genova and Fehon 2003; Faivre-Sarrailh *et al.* 2004; Wu *et al.* 2004; Wu *et al.* 2007;  
50 Tiklová *et al.* 2010; Nelson *et al.* 2010; Ile *et al.* 2012; Bätz *et al.* 2014; Hall *et al.* 2014). Given  
51 that some of these genes have clear developmental functions (e.g. *coracle*'s name derives from  
52 its dorsal open embryonic phenotype; (Fehon *et al.* 1994), we previously undertook an  
53 examination of the developmental requirements for a set of core SJ genes (Hall and Ward 2016).  
54 We found that all of the genes we analyzed (9 in all) are required for morphogenetic  
55 developmental events during embryogenesis including head involution, dorsal closure and  
56 salivary gland organogenesis. Interestingly, these embryonic developmental events occur prior to  
57 the formation of an intact SJ, suggesting that these proteins have a function independent of their  
58 role in creating the occluding junction (Hall and Ward 2016). Since strong loss of function  
59 mutations in every SJ gene are embryonic lethal (due to these morphogenetic defects and/or a  
60 failure in establishing a blood-brain barrier in glial cells; Baumgartner *et al.* 1996), only a few  
61 studies have examined the role of SJ proteins in morphogenesis at a later stages of development.  
62 These studies have revealed roles for SJ proteins in planar polarization of the wing imaginal disc,  
63 for epithelial rotations in the eye and genital imaginal discs, and ommatidia integrity (Lamb *et al.*  
64 1998; Venema *et al.* 2004; Moyer and Jacobs 2008; Banerjee *et al.* 2008).

65 To further explore the role of SJ proteins in morphogenesis beyond the embryonic stage, we  
66 set out to examine the expression and function of a subset of SJ genes in the *Drosophila* egg  
67 chamber during oogenesis. Each of the two *Drosophila* ovaries is comprised of approximately  
68 16-20 ovarioles, which are organized into strings of progressively developing egg chambers  
69 (Figure 1A). Each egg chamber forms in a structure called the germarium, where the germline  
70 and somatic stem cells reside. Once the egg chamber is formed, it leaves the germarium as 16-  
71 cell germline cyst consisting of 15 nurse cells and an oocyte surrounded by a layer of somatic  
72 follicle cells (FCs) (Figure 1B). An egg chamber undergoes 14 developmental stages ending in a  
73 mature egg that is ready for fertilization (reviewed in Horne-Badovinac and Bilder 2005).  
74 Interfollicular cells called stalk cells connect egg chambers to each other. During oogenesis, the  
75 follicular epithelium (FE) undergoes several morphogenetic events including border cell  
76 migration, dorsal appendage formation and egg elongation (reviewed in Horne-Badovinac and  
77 Bilder 2005; reviewed in Duhart *et al.* 2017).

78 Previous studies have revealed that a few core components of the SJ are expressed in the  
79 ovary, including Macroglobulin complement-related (Mcr), Neurexin IV (Nrx-IV), Contactin  
80 (Cont), Neuroglian (Nrg), and Coracle (Cora) (Wei *et al.* 2004; Schneider *et al.* 2006; Maimon *et*  
81 *al.* 2014; Hall *et al.* 2014; Ben-Zvi and Volk 2019), although the developmental expression  
82 pattern and subcellular localizations of these proteins have not been thoroughly investigated.  
83 Furthermore, ultrastructural analysis has revealed the presence of mature SJs in the FE by stage  
84 10/10B of oogenesis (Figure 1C), while incipient SJ structures have been observed in egg  
85 chambers as early as stage 6 (Mahowald 1972; Müller 2000). The biogenesis of SJs in embryonic  
86 epithelia is a multistep process in which SJ proteins are initially localized along the lateral  
87 membrane, but become restricted to an apical-lateral region (the SJ) in a process that required

88 endocytosis and recycling of SJ proteins (Tiklová *et al.* 2010). How SJ maturation occurs in the  
89 FE is unknown.

90 Here, we analyzed the expression and subcellular localization of the core SJ proteins Mcr,  
91 Cont, Nr<sub>x</sub>-IV, and Cora throughout oogenesis. We find that all of these SJ proteins are expressed  
92 in the FE throughout oogenesis. Interestingly, Mcr, Cont, Nr<sub>x</sub>-IV, and Cora become enriched at  
93 the most apical-lateral region of the membrane in stage 10b/11 egg chambers, coincident with  
94 the formation of the SJ revealed by electron microscopy (Mahowald 1972; Müller 2000) .  
95 Similar to the biogenesis of SJs in the embryo, this enrichment of SJ proteins to the presumptive  
96 SJ requires the function of other SJ genes, as well as *Rab5* and *Rab11*. Functional studies using  
97 RNA interference (RNAi) of SJ genes in FCs results in defects in egg elongation, dorsal  
98 appendage morphogenesis and border cell migration. Together, these results reveal a strong  
99 similarity in the biogenesis of SJ between embryonic and follicular epithelia, demonstrate that at  
100 least some components of the SJs are required for morphogenesis in the ovary, and suggest that  
101 these roles may be independent of their role in forming an occluding junction.

102

103

## 104 **Material and methods**

### 105 *Fly stocks*

106 All *Drosophila* stocks were maintained on media consisting of corn meal, sugar, yeast, and agar  
107 on shelves at room temperature or in incubators maintained at a constant temperature of 25°C.  
108 GAL4 lines used in this study are as follows: *GRI-GAL4* (Bloomington Drosophila Stock Center  
109 (BDSC) #36287), *Slbo-GAL4*, *UAS-mCD8-GFP* (BDSC#76363), and *C306-GAL4; GAL80<sup>TS</sup>/Cyo*  
110 (a gift from Jocelyn McDonald, Kansas State University, Manhattan, Kansas). RNAi stocks used

111 for these studies are as follows: *UAS-Mcr-RNAi* (BDSC#65896 and Vienna Drosophila  
112 Resources Center (VDRC)#100197), *UAS-Cora-RNAi* (BDSC#28933 and VDRC#9787), *UAS-*  
113 *Nrx-IV-RNAi* (BDSC#32424 and VDRC#9039), *UAS-Cont-RNAi* (BDSC#28923), *UAS-*  
114 *mCherry-RNAi* (BDSC#35787), *UAS-Lac-RNAi* (BDSC#28940), and *UAS-Sinu-RNAi*  
115 (VDRC#44929). *UAS-Rab5<sup>DN</sup>* (BDSC#9771) was used to inhibit normal Rab5 function and  
116 *UAS-Rab11-RNAi* (BDSC#27730) was used to knock down Rab11 in the follicle cells. *UAS-*  
117 *GAL80<sup>ts</sup>* (BDSC#7108) was used to conditionally inhibit *GRI-GAL4* activity in the *UAS-Rab11-*  
118 *RNAi* experiment. *UAS-GFP* (BDSC#1521) was crossed to *GRI-GAL4* as a control for the egg  
119 shape experiments. *Slbo-GAL4*, *UAS-mCD8-GFP* was crossed to *UAS-mCherry-RNAi* as a  
120 control for one set of border cell migration studies, whereas *C306-GAL4*; *GAL80<sup>ts</sup>/Cyo* was  
121 crossed to *UAS-Dcr* (BDSC#24646) as a control for the other set of border cell migration studies.  
122 *w<sup>1118</sup>* (BDSC# 5905) was used as the wild type stock for determining the expression of *Mcr*,  
123 *Cont*, *Nrx-IV* and *Cora* in the follicle cells.

124

### 125 *Fly staging*

126 *w<sup>1118</sup>* 1-2-day-old females and males were collected and reared at 25°C on fresh food sprinkled  
127 with yeast for five to six days before the females were dissection for antibody staining. For egg  
128 elongation analyses, crosses were maintained at 25°C, and 1-2-day-old females (control and  
129 *UAS-RNAi*-expressing) were mated with sibling males and maintained at 29-30°C for 3 days  
130 before dissection. For border cell migration analyses, *Slbo-GAL4* crosses were kept at 25°C,  
131 whereas *C306-GAL4/UAS-Dcr*; *GAL80<sup>ts</sup>/SJ-RNAi* crosses were kept at 18°C to prevent *GAL4*  
132 activation. 1-2-day-old flies with the appropriate genotype (*Slbo-GAL4*, *UAS-mCD8-GFP/UAS-*  
133 *RNAi* or *C306-GAL4 /UAS-Dcr;UAS-RNAi;GAL80<sup>ts</sup>*) were shifted to 29-30°C for 48 hours



134 before dissection. It should be noted that by crossing *UAS-GFP* to *C306-GAL4*, we observed the  
135 expression of GFP in polar cells in stage 10, but not stage 9 egg chambers (data not shown). For  
136 *Rab11-RNAi* experiment, crosses were maintained at 18°C and 2-3-day-old males and females  
137 with the appropriate genotype (*GRI-GAL4>UAS-mCherry-RNAi*, *UAS-GAL80ts* or *GRI-*  
138 *GAL4>UAS-Rab11-RNAi*, *UAS-GAL80ts*) were collected and reared at 29°C-30°C overnight  
139 before dissection. For the *Rab5<sup>DN</sup>* experiment, crosses were maintained at 25°C, and 1-2-day-old  
140 females were mated to sibling males and maintained at 29-30°C for 3 days before dissection.

141

#### 142 *Egg aspect ratio measurements*

143 Stage 14 egg chambers were selected for analysis based on the overall morphology of the egg  
144 and the absence of nurse cells nuclei by DAPI staining. Stage 14 egg chambers that have  
145 irregular edges or touch other egg chambers were excluded from the analysis to prevent  
146 inaccurate measurements. Egg length (anterior-posterior) and width (dorsal-ventral) were  
147 measured using the ImageJ/Fiji (<http://fiji.sc>) (Schindelin *et al.* 2012) straight-line tool, and  
148 aspect ratio was calculated as length divided by width using Excel Microsoft.

149

#### 150 *Border cell migration quantification*

151 Stage 10 egg chambers were identified based on the morphology of the egg (oocyte occupies half  
152 the egg chamber, whereas the other half is occupied by the nurse cells and centripetal cells). We  
153 used the GFP signal in *Slbo-GAL4* crosses and DAPI and/or Fas3 staining in *c306-GAL4*  
154 crosses to identify the location of the border cell cluster in stage 10 egg chambers. The location  
155 of the border cell cluster was quantified and grouped into four categories - complete, incomplete,  
156 failed migration, and disassociated cluster based on the location of the cluster relative to the

157 oocyte in a stage 10 egg chamber (Figure 6). In some cases, border cell clusters display two  
158 phenotypes such as complete and dissociated. In this case, we quantified both phenotypes in one  
159 egg chamber.

160

#### 161 *Immunostaining and image acquisition*

162 Ovaries were dissected in 1X Phosphate-buffered saline (PBS), fixed in 4% Paraformaldehyde  
163 for 20 minutes, washed three times in 1X PBS, and then permeabilized in a block solution (1X  
164 PBS + 0.1% Triton + 1% Normal Donkey Serum) for 30 minutes before incubation with primary  
165 antibodies either overnight at 4°C or 2-4 hours at room temperature (~23-25°C). The following  
166 antibodies were used at the given dilutions: guinea pig (gp) anti-Cont 1:2000 (*Faivre-Sarrailh et*  
167 *al.* 2004) and rabbit (rab) anti-Nrx-IV 1:500 (Baumgartner *et al.* 1996) obtained from Manzoor  
168 Bhat, University of Texas Health Science Center, San Antonio, TX, gp anti-Mcr 1:1000 (Hall *et*  
169 *al.* 2014), mouse (m) anti-Cora (C566.9 and C615.16 mixed 1:1, obtained from the  
170 Developmental Studies Hybridoma Bank (DSHB) at the University of Iowa, Iowa City, IA;  
171 Fehon *et al.* 1994) 1:50, rat anti-DE-cad (DCAD2, DSHB) 1:27, and m anti-Fas3 (7G10, DSHB)  
172 1:260. DAPI (1mg/ml) was used at a dilution of 1:1000. Secondary antibodies were obtained  
173 from Jackson ImmunoResearch Laboratories (West Grove, Pennsylvania, USA) and were used at  
174 1:500.

175 Images were acquired using an Olympus FV1000 confocal microscope equipped with  
176 Fluoview software (version 4.0.3.4). Objectives used included an UPLSAPO 20X Oil (NA:0.85),  
177 a PLAPON 60X Oil (NA: 1.42), and an UPLSAPO 100X Oil (NA:1.40). Stage 14 egg chambers  
178 were imaged using Nikon Eclipse 80i compound microscope. Raw images were rotated and

179 cropped in ImageJ/Fiji. Micrographs were adjusted for brightness using Adobe Photoshop 21.1.1  
180 (San Jose, CA) or Image/Fiji. Adobe Illustrator 24.1 was used to compile the figures.

181

## 182 *Statistical Analysis*

183 An unpaired *t*-test was used to calculate the P values in egg chamber aspect ratio between control  
184 and SJ mutant stage 14 egg chambers using GraphPad Prism 8 (<https://www.graphpad.com>)  
185 (version 8.4.2).

186

## 187 *Data Availability*

188 Fly stocks are available upon request. Supplemental files are available at FigShare. Figure S1  
189 shows the efficiency of RNAi knock-down in the FE of stage 12 egg chambers. Figure S2 shows  
190 the range of dorsal appendage phenotypes found in *GRI>SJ-RNAi* stage 14 egg chambers.  
191 Figure S3 shows the expression of Contactin during border cell migration. Figure S4 shows the  
192 expression of Nr<sub>x</sub>-IV during border cell migration. Figure S5 shows the expression of Coracle  
193 during border cell migration. The authors affirm that all the data necessary for confirming the  
194 conclusions of the article are present within the article and figures.

195

196

## 197 **Results**

198

### 199 *Septate junction proteins are expressed in follicle cells throughout oogenesis*

200 While a few SJ *proteins* have previously been reported to be expressed in the *Drosophila*  
201 ovary (Wei *et al.* 2004; Schneider *et al.* 2006; Hall *et al.* 2014; Maimon *et al.* 2014; Felix *et al.*

202 2015; Ben-Zvi and Volk 2019), a thorough analysis of their tissue distribution and subcellular  
203 localization throughout oogenesis is lacking. We therefore examined the spatial and temporal  
204 expression of four SJ proteins: Mcr, Cont, Nr<sub>x</sub>-IV and Cora (Fehon *et al.* 1994; Baumgartner *et*  
205 *al.* 1996; Faivre-Sarrailh *et al.* 2004; Bätz *et al.* 2014; Hall *et al.* 2014). These four proteins are  
206 core components of the junction for which well-characterized antibodies are available.

207 At early stages of oogenesis (stages 2-8), Mcr, Cont, and Nr<sub>x</sub>-IV all localize in puncta at the  
208 lateral membrane of FCs and nurse cells, and show a punctate distribution in these cells (Figure  
209 1D-F). Mcr, Cont, and Nr<sub>x</sub>-IV are also more strongly expressed in polar cells (PCs) than the  
210 surrounding FCs (asterisks in Figure 1D-F). Cora is more uniformly localized along the lateral  
211 membrane of the FCs, including the PCs (Figure 1G and data not shown). These SJ proteins are  
212 additionally expressed in stalk cells (arrowheads in Figure 1 D and E and data not shown).  
213 Beginning at stage 10B, Mcr, Nr<sub>x</sub>-IV, Cont and Cora are gradually enriched at the apical-lateral  
214 membrane of the FCs just basal to the AJ. This localization is complete by stage 11 and persists  
215 to the end of oogenesis (arrows in Figure 2B, D, F, and H). The timing of this apical-lateral  
216 enrichment of Mcr, Cont, Nr<sub>x</sub>-IV and Cora coincides with the maturation of the SJ in the FCs  
217 based upon ultrastructural analysis (Mahowald 1972; Müller 2000), and so we will refer to this  
218 region as the presumptive SJ. Finally, all of these SJ proteins continue to be expressed in the FCs  
219 until stage 14 of oogenesis (Figure 2C, E, G and I).

220

### 221 *SJ proteins are required for egg elongation and dorsal appendage morphogenesis*

222 Given our findings that these four SJ proteins are expressed in the FE throughout oogenesis,  
223 and our previous studies indicating a role for SJ proteins in morphogenesis, we wondered  
224 whether SJ proteins might be required for morphogenetic processes in the FE. The FE plays

225 critical roles in shaping the egg chamber and producing the dorsal appendage, while a subset of  
226 FE cells participates in border cell migration to form the micropyle (Montell 2003; Horne-  
227 Badovinac 2020). Because SJ mutant animals die during embryogenesis, we used the *GAL4*  
228 *UAS-RNAi* system to knock-down the expression of SJ proteins in the FCs (Brand and Perrimon  
229 1993). To knock down expression of SJ proteins throughout the majority of oogenesis, we used  
230 *GRI-GAL4*, which is expressed in the FCs from stage 4 to 14 of oogenesis (Gupta and  
231 Schüpbach 2003; Wittes and Schüpbach 2018). In all, we tested Bloomington Transgenic RNAi  
232 Project (TRiP) lines made against six different SJ genes (*Cont*, *cora*, *Mcr*, *lac*, *Nrx-IV*, and *sinu*).  
233 To examine overall egg chamber shape, we dissected stage 14 egg chambers from females  
234 expressing *SJ-RNAi* under the control of *GRI-GAL4*, imaged them on a compound microscope,  
235 and determined the aspect ratio of the egg chambers using measurements of egg chamber length  
236 and width using ImageJ/Fiji. Control stage 14 egg chambers (*GRI-GAL4*>*UAS-GFP*) had a  
237 mean aspect ratio of 2.3 (Figure 3A and J). In contrast, the aspect ratio of stage 14 egg chambers  
238 from all *GRI-GAL4*>*SJ-RNAi* is statistically significant than control egg chambers (aspect ratios  
239 from 1.7 to 2.1; Figure 3B-G and J). All *SJ-RNAi* egg chambers are significantly shorter than  
240 control (Figure 3H), and all but *Mcr-RNAi* and *Cont-RNAi* are also wider than control egg  
241 chamber (Figure 3I). To address the specificity of these results we also tested VDRC RNAi lines  
242 directed against *Mcr*, *Cora*, and *Nrx-IV*, and found similar effects on egg shape (Figure 3). We  
243 also examined SJ protein expression in late-stage egg chambers for *Mcr*, *Cora*, and *Nrx-IV*-  
244 RNAi to demonstrate that the RNAi was efficiently knocking down protein expression in this  
245 tissue (Figure S1).

246 Further examination of stage 14 SJ mutant egg chambers revealed defects in dorsal appendage  
247 morphogenesis. Dorsal appendages are tubular respiratory structures that form from two

248 populations of the dorsal FE known as floor and roof cells (Duhart *et al.* 2017). The primary  
249 phenotypes we observed in the *SJ-RNAi*-expressing egg chambers were missing dorsal  
250 appendages, or appendages that appeared to be short or broken (Figures 3L and S2). In addition,  
251 nearly all of the *SJ-RNAi*-expressing dorsal appendages that were present appeared to have a  
252 thinner stalk than found in control egg chambers (Figure S2). In quantifying these phenotypes,  
253 both BDSC and VDRC RNAi lines against Mcr (BDSC: 52% , VDRC:18%) and Cora (BDSC:  
254 15% and VDRC: 21%) produced egg chambers with defective dorsal appendages (Fig 3M).  
255 However, the *Nrx-IV-RNAi* BDSC line did not produce abnormal dorsal appendages, whereas  
256 33% of VDRC *Nrx-IV-RNAi* line results in defective dorsal appendages. Moreover, 19% of  
257 *Cont-RNAi*- and 13% of *Lac-RNAi*-expressing egg chambers have either missing or broken  
258 dorsal appendages. We did not observe these phenotypes in *Sinu-RNAi*-expressing egg chambers  
259 (Figure 3M).

260

261 *SJ proteins are expressed in polar and border cells and are required for effective border cell*  
262 *migration*

263 The observation that Mcr, Cont, and Nrx-IV are strongly expressed in PCs and in all FCs  
264 (Figure 1D-F), motivated us to investigate their expression during the process of border cell  
265 migration. Border cell migration occurs during stages 9-10 of oogenesis (Figure 4A). During  
266 stage 9, signaling from the anterior PCs recruits a group of 4-8 adjacent FCs to form a cluster  
267 and delaminate apically into the egg chamber. The border cell cluster is organized with a pair of  
268 PCs in the center surrounded by border cells. This cluster of cells migrates between the nurse  
269 cells until they reach the anterior side of the oocyte (Figure 4A). This process takes  
270 approximately 4-6 hours and is complete in wild type egg chambers by stage 10 of oogenesis

271 (Prasad and Montell 2007). The border cell cluster, along with the migratory centripetal cells,  
272 collaborate to form the micropyle, a hole through which the sperm enters the egg (Figure 4A)  
273 (Montell 2003; Horne-Badovinac 2020). Previous studies show that Cora and Nrg are expressed  
274 in the PCs during their migration (Wei *et al.* 2004; Felix *et al.* 2015). To determine if other SJ  
275 proteins are also expressed during border cell migration, we stained stage 9-10 wild type egg  
276 chambers with antibodies against Mcr, Cont, Nrx-IV and Cora. To mark the PCs, we co-stained  
277 the egg chambers with Fasciclin 3 (Fas3; Snow *et al.* 1989; Khammari *et al.* 2011). Mcr, Cont,  
278 Nrx-IV and Cora are all expressed in border cell clusters throughout their migration (Figure 4B-  
279 D and Supplemental Figures 1-3). Interestingly, the expression of these SJ proteins in PCs  
280 appears highest at the interfaces between polar and border cells (Figure 4B-D and Figures S3-5).  
281 SJ protein expression is also asymmetric in the border cell cluster, with higher expression along  
282 border cells closest to the oocyte, raising the possibility that these proteins may respond to or  
283 direct leading-edge polarity in the migrating border cell cluster (red arrows in Figure 4B-D).

284 Given that Mcr, Cont, Nrx-IV and Cora are expressed in border cell clusters throughout  
285 border cell migration, we wondered if they are also required for some aspect of this process. To  
286 address this issue, we used *Slbo-GAL4* (Ogienko *et al.* 2018) to express RNAi against individual  
287 SJ genes specifically in border cells and analyzed the border cell clusters at stage 10 in these  
288 ovaries. We noticed a range of defective migration phenotypes in these egg chambers and  
289 classified them into three non-exclusive groups: failed, incomplete and dissociated clusters.  
290 Complete migration (Figure 5A-C) is characterized by having the entire border cell cluster  
291 physically touching or just adjacent the oocyte by the end of stage 10 (Figure 5C). A failed  
292 cluster is characterized by a border cell cluster that has not delaminated from the FE by stage 10  
293 (Figure 5D). An incomplete migration phenotype is characterized as an intact cluster that has not

294 reached the oocyte by the end of stage 10 (Figure 5E, where the two dashed lines indicate the  
295 range of distances at which border cell clusters were categorized as incomplete). Finally, a  
296 dissociated cluster phenotype is characterized by a cluster that has broken into a linear string of  
297 border cells or that has one or more border cells that remain between nurse cells and are not  
298 connected to the larger border cell cluster (Figure 5F and H).

299 In control stage 10 egg chambers (*Slbo-GAL4; UAS-mCD8-GFP/UAS-mCherry-RNAi*), 86%  
300 (n=81) of border cell clusters completed their migration, with the remainder showing incomplete  
301 migration (Figure 5I). In contrast, stage 10 egg chambers expressing RNAi against *Cora*, *Nrx-IV*,  
302 or *Cont* in the border cells resulted in 58% (n=67), 50% (n=74), and 40% (n=85) of border cell  
303 clusters completing migration, respectively (Figure 5I). The remaining *Cora-RNAi*- and *Nrx-IV*-  
304 *RNAi*-border cell clusters showed a combination of incomplete migration or failed to delaminate  
305 (Figure 5I). *Cont-RNAi*-border cell clusters also showed 35% of incomplete border cell  
306 migration, but additionally had 17% of the clusters disassociating during their migration (Figure  
307 5E, F, H and I). *Mcr-RNAi*-border cell clusters were indistinguishable from controls with 86%  
308 (n=94) completing their migration and the remainder showing only 13% incomplete migration  
309 (Figure 5I).

310 To extend these studies, we examined border cell migration in egg chambers expressing  
311 RNAi against SJ genes using the *C306-GAL4* driver. *C306-GAL4* is expressed in the border  
312 cells throughout the process of border cell migration (Murphy and Montell 1996) and in PCs just  
313 at stage 10 (H.A., unpublished observation). In control egg chambers (*C306-GAL4/UAS-Dcr*;  
314 *GAL80<sup>ts/+</sup>*), 78% (n=91) of BC clusters completed their migration and 19% displayed incomplete  
315 migration (Figure 5J). Stage 10 egg chambers expressing *C306>Mcr-RNAi* displayed 66%  
316 (n=98) complete border cell migration with 30% showing incomplete migration, 5% showing



317 dissociated clusters and 3% showing failed border cell migration (Figure 5J). Similarly, egg  
318 chambers expressing *C306>Nrx-IV-RNAi* displayed 66% (n=59) complete border cell migration  
319 with 30% showing incomplete migration and 3% failing to delaminate (Figure 5J). Finally, 78%  
320 (n=70) of stage 10 *C306>cora-RNAi*-expressing border cells displayed complete border cell  
321 migration, whereas 20% showed incomplete migration and 3% failed to delaminate (Figure 5J).

322

### 323 *SJ biogenesis in the follicular epithelium*

324 The redistribution of SJ proteins in the FCs of later stage egg chambers resembles the  
325 dynamic relocalization of SJ proteins during the biogenesis of the junction during embryogenesis  
326 (Tiklová *et al.* 2010). In embryonic epithelia, SJ protein enrichment at the apical-lateral domain  
327 (presumptive SJ) requires endocytosis and recycling of SJ proteins to the membrane, and is  
328 interdependent on the presence of all core SJ proteins (Ward *et al.* 1998; Hall *et al.* 2014).  
329 Coincident with the strong localization of SJ proteins to the presumptive SJ at stage 16 of  
330 embryogenesis, ladder-like electron-dense intermembrane septae are visible by electron  
331 microscopy that become progressively organized by stage 17 (Schulte *et al.* 2003; Hildebrandt *et*  
332 *al.* 2015). We therefore sought to determine if similar processes occur during the formation of  
333 SJs in the FE.

334 To test for the interdependence of SJ proteins for localization, we examined Cora and Mcr  
335 expression in wild type, *Mcr-RNAi*, and *Nrx-IV-RNAi* stage 12 FCs. In wild type stage 12 egg  
336 chambers, Cora is strongly co-localized with Mcr at the apical-lateral domain of the FCs  
337 (completely penetrant in 95 cells from 31 egg chambers) (Figure 6A). In contrast, Cora and Mcr  
338 are mislocalized along the lateral domain in stage 12 *Nrx-IV-RNAi* FCs (Figure 6B), much like  
339 they are in stage 2-8 wild type FCs (Figure 1D). Specifically, 6 out of 20 *Nrx-IV-RNAi* FCs cells

340 from 19 egg chambers showed complete mislocalization, whereas 13 of these 20 cells showed  
341 largely lateral localization with some degree of apical enrichment. Similarly, in stage 12 *Mcr*-  
342 *RNAi* FCs, Cora was mislocalized along the lateral membrane in 39 out of 47 cells examined  
343 from 19 egg chambers, with the remaining 8 cells showing some enrichment of Cora at the apical  
344 lateral domain (Figure 6C). Notably, cells that showed apical enrichment of Cora also retained  
345 small foci of *Mcr* expression that overlaps with the enriched Cora (Figure 6D), suggesting the  
346 perdurance of *Mcr* in these cells may have allowed for normal SJ organization. Together, these  
347 experiments indicate that SJ biogenesis in the FE of late-stage egg chambers requires the  
348 expression of at least some core SJ proteins.

349 We next wanted to investigate whether the relocalization of SJ proteins to the presumptive SJ  
350 required endocytosis and recycling. In the embryonic hindgut, Cora, Gliotactin (Gli), Sinu, and  
351 Melanotransferrin (Mtf) localize with the early endosomal marker, Rab5, and partially localize  
352 with the recycling marker, Rab11 during SJ biogenesis (Tiklová *et al.* 2010). Moreover, blocking  
353 Rab5 or Rab11 function prevents Cora, Gli, Sinu, and Mtf apical-lateral localization (Tiklová *et*  
354 *al.* 2010), and thus SJ formation. To determine if similar processes occur during SJ formation in  
355 FCs, we expressed a dominant negative version of Rab5 (*UAS-Rab5<sup>DN</sup>*) in FCs using *GRI-GAL4*  
356 and examined the expression of *Mcr* and Cora in stage 11 FCs. In wild-type FCs at that stage,  
357 *Mcr* and Cora are enriched at the apical-lateral membrane (completely penetrant in 91 cells from  
358 15 egg chambers; arrows in Figure 7A), whereas both *Mcr* and Cora remains localized along the  
359 lateral membrane in the Rab5<sup>DN</sup>-expressing FCs (n=97 cells, 15 egg chambers; Figure 7B).  
360 Similarly, Cora and *Mcr* co-localize at the apical-lateral membrane of the FCs of stage 12 egg  
361 chambers (n=64 cells, 15 egg chambers; arrows in Figure 7C), whereas knocking down the  
362 expression of Rab11 in stage 12 FCs results in the mislocalization of Cora and *Mcr* (n=23 cells

363 out of 44, 16 egg chambers; arrow in Figure 7D). Cora is exclusively mislocalized along the  
364 lateral membrane in these cells, whereas Mcr is most frequently missing from the plasma  
365 membrane, either in punctate cytoplasmic foci or completely gone (in 21 of the 23 *Rab11-RNAi*  
366 cells; Figure 7D). Interestingly, we noted that the FE in *Rab5<sup>DN</sup>*- and *Rab11-RNAi*-expressing  
367 egg chambers are taller in the apical/basal dimension than similarly staged wild type egg  
368 chambers (compare Figure 7A with 7B and Figure 7C with 7D), although the effect is greater  
369 with *Rab5<sup>DN</sup>* than with *Rab11-RNAi*. Taken together, these results suggest that similar to  
370 embryonic epithelia, the maturation of SJs in the FE requires Rab5-mediated endocytosis and  
371 Rab11-mediated recycling.

372

373

## 374 **Discussion**

375 In this study, we have demonstrated that a subset of SJ proteins is expressed in egg chambers  
376 throughout oogenesis and are required for critical morphogenetic processes that shape the egg,  
377 including egg chamber elongation, dorsal appendage formation and border cell migration  
378 (required to form the micropyle). Interestingly, the subcellular localization of these SJ proteins in  
379 the ovarian FCs changes coincident with the establishment of the occluding junction in much the  
380 same way that they do during embryogenesis in ectodermal epithelial cells (Tiklová *et al.* 2010),  
381 suggesting that a similar maturation process for the SJ occurs in this tissue.

382

### 383 *Biogenesis of the SJ in the FE*

384 The mechanisms of SJ biogenesis in embryonic epithelia has been well-studied and involves  
385 several steps in which transmembrane SJ proteins are first localized all along lateral plasma

386 membranes (by stage 12 of embryogenesis), but then must be endocytosed and recycled back to  
387 the plasma membrane prior to aggregating in the region of the presumptive SJ (between stages  
388 13 and 16; Tiklová *et al.* 2010). Prior to this relocalization step, SJ proteins show high mobility  
389 in the plane of the membrane by Fluorescence Recovery After Photobleaching (FRAP) analysis,  
390 but become strongly immobile as the relocalization is occurring (Oshima and Fehon 2011). As  
391 these steps are occurring (e.g. stage 14 of embryogenesis), electron-dense material begins to  
392 accumulate between adjacent cells in the presumptive SJ that takes on the appearance of ladder-  
393 like septae by stage 17 of embryogenesis (Tepass and Hartenstein 1994). Functional studies  
394 indicate that the occluding function of the junction is established late in embryogenesis, near the  
395 end of stage 15 (Paul *et al.* 2003). Importantly, the process of SJ biogenesis is interdependent on  
396 the function of all core components of the junction and several accessory proteins including Rab  
397 5 and Rab 11 (Ward *et al.* 1998; Genova and Fehon 2003; Tiklová *et al.* 2010).

398 Here, we observe that many of these same steps occur in the maturation of SJs in the FE. We  
399 first show that SJ proteins are expressed in the FE beginning early in ovarian development where  
400 they localize all along the lateral membrane (Figure 1). These proteins appear to become  
401 enriched at the presumptive SJ by stage 11 (Figure 6). The relocalization of SJ proteins to the SJ  
402 requires core SJ proteins including Mcr and NrX-IV, and accessory proteins including Rab 5 and  
403 Rab 11 (Figures 6 and 7). Prior studies indicate the presence of electron dense material between  
404 FE cells as early as stage 6 (Müller 2000), with a ladder-like appearance of extracellular septae  
405 by stage 10B (Mahowald 1972). A recent study of the occluding function in the FE show a  
406 similar pattern of protein localization for endogenously tagged Neuroglian-YFP and Lachesin-  
407 GFP, and demonstrates that an intact occluding junction is formed during stage 11 of oogenesis  
408 (Isasti-Sanchez *et al.* 2020). It is interesting to note the FE is a secondary epithelium initiated by

409 a mesenchymal to epithelial transition (Tepass *et al.* 2001), and yet SJ biogenesis appears to be  
410 very similar to that observed in the primary epithelia found in the embryo.

411

412 *SJ proteins are required for morphogenetic events during oogenesis*

413 The similarities in the dynamic expression of SJ proteins in the FE and embryonic epithelia,  
414 coupled with the observation that SJ proteins are required for numerous embryonic  
415 developmental events (Hall *et al.* 2014) and references therein) motivated us to explore whether  
416 SJ proteins have similar roles in morphogenetic processes that shape the egg. Using a targeted  
417 RNAi approach, we show that reducing the expression of Mcr, Nr<sub>x</sub>-IV, Cont, Cora, Sinu, or Lac  
418 throughout oogenesis in the FCs results in significantly rounder stage 14 egg chambers, with  
419 many showing additional defects in dorsal appendages (Figures 3 and S2). The initiation and  
420 maintenance of egg elongation is achieved at various stages throughout oogenesis (Gates 2012;  
421 Bilder and Haigo 2012; Cetera and Horne-Badovinac 2015). From stage 3-6, a gradient of JAK-  
422 STAT signaling is required at each pole of the egg chamber to promote Myosin II-based apical  
423 cell contractions (Alégot *et al.* 2018). From stage 6-8, the formation of a robust planar polarized  
424 molecular corset - consisting of basal actin cytoskeleton and basement membrane protein fibrils -  
425 is required for egg elongation, and requires collective FC migration over a static basement  
426 membrane (Gutzeit *et al.* 1991; Frydman and Spradling 2001; Bateman *et al.* 2001; Viktorinová  
427 *et al.* 2009; Haigo and Bilder 2011; Horne-Badovinac *et al.* 2012; Cetera *et al.* 2014; Isabella  
428 and Horne-Badovinac 2016; Campos *et al.* 2020). During the middle stages of oogenesis (stages  
429 9 and 10), basal actin stress fibers undergo actomyosin contractions, which contribute to egg  
430 elongation (He *et al.* 2010; Qin *et al.* 2017). Finally, later in oogenesis, the maintenance of a  
431 planar polarized molecular corset is required to retain an elongated egg chamber shape (Haigo

432 and Bilder 2011; Cha *et al.* 2017; Campos *et al.* 2020). Future studies are needed to determine if  
433 SJ proteins are required for the establishment and/or maintenance of egg shape. Since many of  
434 the events involved in egg elongation occur prior to the formation of a functional (and  
435 ultrastructurally intact) occluding junction, it raises the possibility that SJ proteins have a  
436 function in morphogenesis that is independent of their role in forming a tight occluding junction,  
437 much as they do in the embryo.

438 Stage 14 egg chambers from many of the *SJ-RNAi* lines possessed aberrant dorsal  
439 appendages, often characterized by misshapen, broken or missing appendages (Figures 3 and  
440 S2). The formation of dorsal appendages occurs during stages 10B-14 and requires cell shape  
441 changes and cell rearrangements, coupled with chorion protein secretion (Dorman *et al.* 2004).  
442 Similar morphogenetic processes are required for dorsal closure and head involution during  
443 embryogenesis (Hayes and Solon 2017; VanHook and Letsou 2008), defects strongly associated  
444 with zygotic loss of SJ expression in the embryo (Hall and Ward 2016). We are interested to  
445 determine if the mechanism by which SJ proteins contribute to dorsal appendages formation and  
446 dorsal closure and head involution are similar. Potential roles could involve regulating the  
447 cytoskeleton to facilitate cell shape changes and rearrangements, but another intriguing  
448 possibility is that SJ proteins may also be required for chorion protein secretion or crosslinking.  
449 Broken and missing dorsal appendages may result from mechanical disruption due to chorion  
450 defects. We also noticed mature *SJ-RNAi* eggs with a thin chorion (data not shown). Notably,  
451 embryos with mutations in many different SJ genes show defects in the embryonic cuticle  
452 including faint denticle belts and delamination of cuticle layers (Lamb *et al.* 1998; Hall and  
453 Ward 2016).

454 Our observation that specifically knocking down the expression of several SJ proteins in  
455 border cells results in defective border cell migration (Figure 5) supports a role for SJ proteins in  
456 morphogenesis, independent of their role in forming an occluding junction. The phenotypes we  
457 observed include failing to complete migration and partial disassociation of the complex by the  
458 end of stage 10, which is prior to the formation of an intact SJ. Although the penetrance of these  
459 phenotypes is mild (Figure 5I and J), it is possible that these phenotypes underestimate the full  
460 requirement of SJ proteins in border cell migration since this process takes a relatively short time  
461 (4-6 hours) (Prasad and Montell 2007), while SJ proteins are thought to be very stable in the  
462 membrane (Oshima and Fehon 2011). One caveat to the idea that perdurance may account for the  
463 mild phenotypes is that *C306-GAL4* does not appear to produce a stronger phenotype than *slbo-*  
464 *GAL4*, even though it is expressed earlier and is presumably knocking down SJ proteins longer.  
465 Perhaps knocking the proteins down more quickly using the DeGradFP system (Caussinus,  
466 Kanca, and Affolter 2012) could address this possibility in the future. These phenotypes also  
467 indicate a potential role for SJ proteins in cell adhesion and/or cell polarity during migration.  
468 Specifically, we note that Mcr appears to be enriched in polar cell membranes that contact border  
469 cells at the leading edge of the cluster (those that are oriented closest to the oocyte) in wild type  
470 egg chambers (Figure 4). Whether SJ proteins are required for aspects of planar polarity in the  
471 border cell cluster is an interesting unanswered question. Perhaps the incomplete migration  
472 defect results from a meandering migration through the nurse cells, something that has been  
473 observed for knockdown of DE-Cadherin in border cells (Cai et al. 2014). Live imaging studies  
474 should be able to distinguish between pathfinding defects and a general reduction in speed or  
475 premature stopping. A role for SJ proteins in cell adhesion in the ovary has been reported  
476 previously. Reducing the level of Nrg in FCs results in the failure of newly divided FCs to

477 reintegrate into the FE, indicating a role for *Nrg* in lateral cell adhesion (Bergstralh *et al.* 2015).  
478 In addition, expressing a null allele of *Nrg* in FCs enhances the invasive tumor phenotype of a  
479 *Discs Large (Dlg)* mutation (Wei *et al.* 2004).

480

#### 481 **Acknowledgements**

482 We thank Jocelyn McDonald, the Bloomington *Drosophila* Stock Center, and the Vienna  
483 *Drosophila* RNAi Center for fly stocks. We thank Manzoor Bhat and the Developmental Studies  
484 Hybridoma Bank (created by the NICHD of the NIH and maintained at The University of Iowa,  
485 Department of Biology, Iowa City, IA 52242) for antibodies used in this study. We thank Brian  
486 Ackley for the use of his Olympus FV1000 confocal microscope. We thank Lindsay Ussher for  
487 preliminary studies on border cell migration and thoughtful discussions on the project. We also  
488 thank Sally Horne-Badovinac, Jocelyn McDonald, Yujun Chen, and members of the Ward lab  
489 for helpful discussion about the project and manuscript.



490 **References:**

- 491 Alégot, H., P. Pouchin, O. Bardot, and V. Mirouse. 2018. “Jak-Stat Pathway Induces *Drosophila*
- 492 Follicle Elongation by a Gradient of Apical Contractility.” *ELife* 7: 1–21.
- 493 <https://doi.org/10.7554/eLife.32943>.
- 494 Banerjee, S, R. J. Bainton, N. Mayer, R Beckstead, and Manzoor A. Bhat. 2008. “Septate
- 495 Junctions Are Required for Ommatidial Integrity and Blood-Eye Barrier Function in
- 496 *Drosophila*.” *Nature* 317 (2): 585–99. <https://doi.org/10.1038/jid.2014.371>.
- 497 Bateman, J., R. S. Reddy, H. Saito, and D. Van Vactor. 2001. “The Receptor Tyrosine
- 498 Phosphatase Dlar and Integrins Organize Actin Filaments in the *Drosophila* Follicular
- 499 Epithelium.” *Current Biology* 11 (17): 1317–27. <https://doi.org/10.1016/S0960->
- 500 [9822\(01\)00420-1](https://doi.org/10.1016/S0960-9822(01)00420-1).
- 501 Bätz, T., D. Förster, and S. Luschign. 2014. “The Transmembrane Protein Macroglobulin
- 502 Complement-Related Is Essential for Septate Junction Formation and Epithelial Barrier
- 503 Function in *Drosophila*.” *Development* 141 (4): 899–908.
- 504 <https://doi.org/10.1242/dev.102160>.
- 505 Baumgartner, S., J. T. Littleton, K. Broadie, M. A. Bhat, R. Harbecke, J. A. Lengyel, R. Chiquet-
- 506 Ehrismann, A. Prokop, and H. J. Bellen. 1996. “A *Drosophila* Neurexin Is Required for
- 507 Septate Junction and Blood-Nerve Barrier Formation and Function.” *Cell* 87 (6): 1059–68.
- 508 [https://doi.org/10.1016/S0092-8674\(00\)81800-0](https://doi.org/10.1016/S0092-8674(00)81800-0).
- 509 Behr, M., D. Riedel, and R. Schuh. 2003. “The Claudin-like Megatrachea Is Essential in Septate
- 510 Junctions for the Epithelial Barrier Function in *Drosophila*.” *Developmental Cell* 5 (4):
- 511 611–620. [https://doi.org/https://doi.org/10.1016/S1534-5807\(03\)00275-2](https://doi.org/https://doi.org/10.1016/S1534-5807(03)00275-2).
- 512 Ben-Zvi, D. S., and T. Volk. 2019. “Escort Cell Encapsulation of *Drosophila* Germline Cells Is

- 513 Maintained by Irre Cell Recognition Module Proteins.” *Biology Open* 8 (3).  
514 <https://doi.org/10.1242/bio.039842>.
- 515 Bilder, D., and S. L. Haigo. 2012. “Expanding the Morphogenetic Repertoire: Perspectives from  
516 the Drosophila Egg.” *Developmental Cell* 22 (1): 12–23.  
517 <https://doi.org/10.1016/j.devcel.2011.12.003>.
- 518 Brand, A. H., and N. Perrimon. 1993. “Targeted Gene Expression as a Means of Altering Cell  
519 Fates and Generating Dominant Phenotypes.” *Development* 118 (2): 401–15.
- 520 Cai, D., S. C. Chen, M. Prasad, L. He, X. Wang, V. Choismel-Cadamuro, J. K. Sawyer, G.  
521 Danuser, and D. J. Montell. 2014. “Mechanical Feedback through E-Cadherin Promotes  
522 Direction Sensing during Collective Cell Migration.” *Cell* 157 (5): 1146–59.  
523 <https://doi.org/10.1016/j.cell.2014.03.045>.
- 524 Campos, F. C., C. Dennis, H. Alégot, C. Fritsch, A. Isabella, P. Pouchin, O. Bardot, S. Horne-  
525 Badovinac, and V. Mirouse. 2020. “Oriented Basement Membrane Fibrils Provide a  
526 Memory for F-Actin Planar Polarization via the Dystrophin-Dystroglycan Complex during  
527 Tissue Elongation.” *Development (Cambridge)* 147 (7). <https://doi.org/10.1242/dev.186957>.
- 528 Caussinus, E., O. Kanca, and M. Affolter. 2012. “Fluorescent Fusion Protein Knockout Mediated  
529 by Anti-GFP Nanobody.” *Nature Structural and Molecular Biology* 19 (1): 117–22.  
530 <https://doi.org/10.1038/nsmb.2180>.
- 531 Cetera, M., and S. Horne-Badovinac. 2015. “Round and Round Gets You Somewhere: Collective  
532 Cell Migration and Planar Polarity in Elongating Drosophila Egg Chambers.” *Current  
533 Opinion in Genetics and Development* 32: 10–15.  
534 <https://doi.org/10.1016/j.gde.2015.01.003>.
- 535 Cetera, M., G. R. Ramirez-San Juan, P. W. Oakes, L. Lewellyn, M. J. Fairchild, G. Tanentzapf,

- 536 M. L. Gardel, and S. Horne-Badovinac. 2014. “Epithelial Rotation Promotes the Global  
537 Alignment of Contractile Actin Bundles during *Drosophila* Egg Chamber Elongation.”  
538 *Nature Communications* 5: 5511. <https://doi.org/10.1038/ncomms6511>.
- 539 Cha, I. J., J. H. Lee, K. S. Cho, and S. B. Lee. 2017. “*Drosophila* Tensin Plays an Essential Role  
540 in Cell Migration and Planar Polarity Formation during Oogenesis by Mediating Integrin-  
541 Dependent Extracellular Signals to Actin Organization.” *Biochemical and Biophysical  
542 Research Communications* 484 (3): 702–9. <https://doi.org/10.1016/j.bbrc.2017.01.183>.
- 543 Dorman, J. B., K. E. James, S. E. Fraser, D. P. Kiehart, and C. A. Berg. 2004. “Bullwinkle Is  
544 Required for Epithelial Morphogenesis during *Drosophila* Oogenesis.” *Developmental  
545 Biology* 267 (2): 320–41. <https://doi.org/10.1016/j.ydbio.2003.10.020>.
- 546 Duhart, J. C., T. T. Parsons, and L. A. Raftery. 2017. “The Repertoire of Epithelial  
547 Morphogenesis on Display: Progressive Elaboration of *Drosophila* Egg Structure.”  
548 *Mechanisms of Development*. Elsevier Ireland Ltd.  
549 <https://doi.org/10.1016/j.mod.2017.04.002>.
- 550 Faivre-Sarrailh, C., S. Banerjee, J. Li, M. Hortsch, L. Monique, and M. A. Bhat. 2004.  
551 “*Drosophila* Contactin, a Homolog of Vertebrate Contactin, Is Required for Septate  
552 Junction Organization and Paracellular Barrier Function.” *Development* 131 (20): 4931–42.  
553 <https://doi.org/10.1242/dev.01372>.
- 554 Fehon, R. G., I. A. Dawson, and S. Artavanis-Tsakonas. 1994. “A *Drosophila* Homologue of  
555 Membrane-Skeleton Protein 4.1 Is Associated with Septate Junctions and Is Encoded by the  
556 Coracle Gene.” *Development* 120 (3): 545–57. <https://doi.org/10.1083/jcb.120.1.129>.
- 557 Felix, M., M. Chayengia, R. Ghosh, A. Sharma, and M. Prasad. 2015. “Pak3 Regulates Apical-  
558 Basal Polarity in Migrating Border Cells during *Drosophila* Oogenesis.” *Development* 142

- 559 (21): 3692–3703. <https://doi.org/10.1242/dev.125682>.
- 560 Frydman, H. M., and A. C. Spradling. 2001. “The Receptor-like Tyrosine Phosphatase Lar Is  
561 Required for Epithelial Planar Polarity and for Axis Determination within *Drosophila*  
562 Ovarian Follicles.” *Development (Cambridge, England)* 128 (16): 3209–20.  
563 <http://www.ncbi.nlm.nih.gov/pubmed/11688569>.
- 564 Gates, J. 2012. “*Drosophila* Egg Chamber Elongation: Insights into How Tissues and Organs Are  
565 Shaped.” *Fly* 6 (4): 213–27. <https://doi.org/10.4161/fly.21969>.
- 566 Genova, J. L., and R. G. Fehon. 2003. “Neuroglian, Gliotactin, and the Na<sup>+</sup>/K<sup>+</sup> ATPase Are  
567 Essential for Septate Junction Function in *Drosophila*.” *Journal of Cell Biology* 161 (5):  
568 979–89. <https://doi.org/10.1083/jcb.200212054>.
- 569 Gupta, T., and T. Schüpbach. 2003. “Cct1, a Phosphatidylcholine Biosynthesis Enzyme, Is  
570 Required for *Drosophila* Oogenesis and Ovarian Morphogenesis.” *Development* 130 (24):  
571 6075–87. <https://doi.org/10.1242/dev.00817>.
- 572 Gutzeit, H. O, W. Eberhardt, and E. Gratwohl. 1991. “Laminin and Basement Membrane-  
573 Associated Microfilaments in Wild-Type and Mutant *Drosophila* Ovarian Follicles.”  
574 *Journal of Cell Science* 100 (Pt(4)): 781–88.
- 575 Haigo, S. L., and D. Bilder. 2011. “Global Tissue Revolutions in a Morphogenetic Movement  
576 Controlling Elongation.” *Science* 331 (6020): 1071–74.  
577 <https://doi.org/10.1126/science.1199092>.
- 578 Hall, S., C. Bone, K. Oshima, L. Zhang, M. McGraw, B. Lucas, R. G. Fehon, and R. E. Ward.  
579 2014. “Macroglobulin Complement-Related Encodes a Protein Required for Septate  
580 Junction Organization and Paracellular Barrier Function in *Drosophila*.” *Development* 141  
581 (4): 889–98. <https://doi.org/10.1242/dev.102152>.

- 582 Hall, S., and R. E. Ward. 2016. “Septate Junction Proteins Play Essential Roles in  
583 Morphogenesis Throughout Embryonic Development in *Drosophila*.” *G3 &#58;  
584 Genes/Genomes/Genetics* 6 (8): 2375–84. <https://doi.org/10.1534/g3.116.031427>.
- 585 Hayes, P., and J. Solon. 2017. “*Drosophila* Dorsal Closure: An Orchestra of Forces to Zip Shut  
586 the Embryo.” *Mechanisms of Development* 144: 2–10.  
587 <https://doi.org/10.1016/j.mod.2016.12.005>.
- 588 He, L., X. Wang, H. L. Tang, and D. J. Montell. 2010. “Tissue Elongation Requires Oscillating  
589 Contractions of a Basal Actomyosin Network.” *Nature Cell Biology* 12 (12): 1133–42.  
590 <https://doi.org/10.1038/ncb2124>.
- 591 Hildebrandt, A., R. Pflanz, M. Behr, T. Tarp, D. Riedel, and R. Schuh. 2015. “Bark Beetle  
592 Controls Epithelial Morphogenesis by Septate Junction Maturation in *Drosophila*.”  
593 *Developmental Biology* 400 (2): 237–47. <https://doi.org/10.1016/j.ydbio.2015.02.008>.
- 594 Horne-Badovinac, S. 2020. “The *Drosophila* Micropyle as a System to Study How Epithelia  
595 Build Complex Extracellular Structures.” *Philosophical Transactions of the Royal Society  
596 of London. Series B, Biological Sciences* 375 (1809): 20190561.  
597 <https://doi.org/10.1098/rstb.2019.0561>.
- 598 Horne-Badovinac, S., and D. Bilder. 2005. “Mass Transit: Epithelial Morphogenesis in the  
599 *Drosophila* Egg Chamber.” *Developmental Dynamics* 232 (3): 559–74.  
600 <https://doi.org/10.1002/dvdy.20286>.
- 601 Horne-Badovinac, S, J Hill, G Gerlach, W Menegas, and D Bilder. 2012. “A Screen for Round  
602 Egg Mutants in *Drosophila* Identifies Tricornered, Furry, and Misshapen as Regulators of  
603 Egg Chamber Elongation.” *G3 &#58; Genes/Genomes/Genetics* 2 (3): 371–78.  
604 <https://doi.org/10.1534/g3.111.001677>.

- 605 Ile, K. E., R. Tripathy, V. Goldfinger, and A. D. Renault. 2012. “Wunen, a *Drosophila* Lipid  
606 Phosphate Phosphatase, Is Required for Septate Junction-Mediated Barrier Function.”  
607 *Development* 139 (14): 2535–46. <https://doi.org/10.1242/dev.077289>.
- 608 Isabella, A. J., and S. Horne-Badovinac. 2016. “Rab10-Mediated Secretion Synergizes with  
609 Tissue Movement to Build a Polarized Basement Membrane Architecture for Organ  
610 Morphogenesis.” *Developmental Biology* 38 (1): 47–60.  
611 <https://doi.org/10.1016/j.devcel.2016.06.009>.
- 612 Isasti-Sanchez, J., F. Munz-Zeise, and S. Luschnig. 2020. “Transient Opening of Tricellular  
613 Vertices Controls Paracellular Transport through the Follicle Epithelium during *Drosophila*  
614 Oogenesis.” *BioRxiv*, no. CiM: 2020.02.29.971168.  
615 <https://doi.org/10.1101/2020.02.29.971168>.
- 616 Izumi, Y., and M. Furuse. 2014. “Molecular Organization and Function of Invertebrate  
617 Occluding Junctions.” *Seminars in Cell and Developmental Biology* 36: 186–93.  
618 <https://doi.org/10.1016/j.semcdb.2014.09.009>.
- 619 Khammari, A., F. Agnès, P. Gandille, and A. M. Pret. 2011. “Physiological Apoptosis of Polar  
620 Cells during *Drosophila* Oogenesis Is Mediated by Hid-Dependent Regulation of Diap1.”  
621 *Cell Death and Differentiation* 18 (5): 793–805. <https://doi.org/10.1038/cdd.2010.141>.
- 622 Lamb, R. S., R. E. Ward, L. Schweizer, and R. G. Fehon. 1998. “*Drosophila* Coracle, a Member  
623 of the Protein 4.1 Superfamily, Has Essential Structural Functions in the Septate Junctions  
624 and Developmental Functions in Embryonic and Adult Epithelial Cells.” *Molecular Biology*  
625 *of the Cell* 9 (12): 3505–19. <https://doi.org/10.1091/MBC.9.12.3505>.
- 626 Mahowald, A. P. 1972. “Ultrastructural Observations on Oogenesis in *Drosophila*.” *Journal of*  
627 *Morphology* 137 (1): 29–48. <https://doi.org/10.1002/jmor.1051370103>.

- 628 Maimon, I., M. Popliker, and L. Gilboa. 2014. “Without Children Is Required for Stat-Mediated  
629 Zfh1 Transcription and for Germline Stem Cell Differentiation.” *Development (Cambridge)*  
630 141 (13): 2602–10. <https://doi.org/10.1242/dev.109611>.
- 631 Montell, D. J. 2003. “Border-Cell Migration: The Race Is On.” *Nature Reviews Molecular Cell*  
632 *Biology* 4 (1): 13–24. <https://doi.org/10.1038/nrm1006>.
- 633 Moyer, K. E., and J. R. Jacobs. 2008. “Varicose: A MAGUK Required for the Maturation and  
634 Function of Drosophila Septate Junctions.” *BMC Developmental Biology* 8.  
635 <https://doi.org/10.1186/1471-213X-8-99>.
- 636 Müller, H. J. 2000. “Genetic Control of Epithelial Cell Polarity: Lessons from Drosophila.”  
637 *Developmental Dynamics* 218 (1): 52–67. [https://doi.org/10.1002/\(sici\)1097-  
638 0177\(200005\)218:1<52::aid-dvdy5>3.3.co;2-c](https://doi.org/10.1002/(sici)1097-0177(200005)218:1<52::aid-dvdy5>3.3.co;2-c).
- 639 Murphy, A. M., and D. J. Montell. 1996. “Cell Type-Specific Roles for Cdc42, Rac, and Rho1 in  
640 Drosophila Oogenesis.” *Journal of Cell Biology* 133 (3): 617–30.  
641 <https://doi.org/10.1083/jcb.133.3.617>.
- 642 Nelson, K. S., M. Furuse, and G.J. Beitel. 2010. “The Drosophila Claudin Kune-Kune Is  
643 Required for Septate Junction Organization and Tracheal Tube Size Control.” *Genetics* 185  
644 (3): 831–39. <https://doi.org/10.1534/genetics.110.114959>.
- 645 Noirot-timothee, C., D. S. Smith, M. L. Cayer, and C. Noirot. 1978. “Septate Junctions in  
646 Insects: Comparison between Intercellular and Intramembranous Structures.” *Tissue and*  
647 *Cell* 10 (1): 125–36. [https://doi.org/10.1016/0040-8166\(78\)90011-3](https://doi.org/10.1016/0040-8166(78)90011-3).
- 648 Ogienko, A. A., L. A. Yarinich, E. V. Fedorova, M. O. Lebedev, E. N. Andreyeva, A. V.  
649 Pindyurin, and E. M. Baricheva. 2018. “New Slbo-Gal4 Driver Lines for the Analysis of  
650 Border Cell Migration during Drosophila Oogenesis.” *Chromosoma* 127 (4): 475–87.

- 651 <https://doi.org/10.1007/s00412-018-0676-7>.
- 652 Oshima, Kenzi, and Richard G Fehon. 2011. “Analysis of Protein Dynamics within the Septate  
653 Junction Reveals a Highly Stable Core Protein Complex That Does Not Include the  
654 Basolateral Polarity Protein Discs Large.” *Journal of Cell Science* 124 (Pt 16): 2861–71.  
655 <https://doi.org/10.1242/jcs.087700>.
- 656 Paul, S. M., M. Ternrt, P. Salvaterra, and G. Beitel. 2003. “The Na<sup>+</sup>/K<sup>+</sup> ATPase Is Required for  
657 Septate Junction Function and Epithelial Tube-Size Control in the Drosophila Tracheal  
658 System.” *Development* 130 (20): 4963–74. <https://doi.org/10.1242/dev.00691>.
- 659 Prasad, M., and D. J. Montell. 2007. “Cellular and Molecular Mechanisms of Border Cell  
660 Migration Analyzed Using Time-Lapse Live-Cell Imaging.” *Developmental Cell* 12 (6):  
661 997–1005. <https://doi.org/10.1016/j.devcel.2007.03.021>.
- 662 Qin, X., B. O. Park, J. Liu, B. Chen, V. Choesmel-Cadamuro, K. Belguise, W. D. Heo, and X.  
663 Wang. 2017. “Cell-Matrix Adhesion and Cell-Cell Adhesion Differentially Control Basal  
664 Myosin Oscillation and Drosophila Egg Chamber Elongation.” *Nature Communications* 8:  
665 14708. <https://doi.org/10.1038/ncomms14708>.
- 666 Schindelin, J., I. Arganda-Carreras, E. Frise, V. Kaynig, M. Longair, T. Pietzsch, S. Preibisch, et  
667 al. 2012. “Fiji: An Open-Source Platform for Biological-Image Analysis.” *Nature Methods*  
668 9 (7): 676–82. <https://doi.org/10.1038/nmeth.2019>.
- 669 Schneider, M., A.K. Khalil, J. Poulton, C. Castillejo-Lopez, D. Egger-Adam, A. Wodarz, W.  
670 Deng, and S. Baumgartner. 2006. “Perlecan and Dystroglycan Act at the Basal Side of the  
671 Drosophila Follicular Epithelium to Maintain Epithelial Organization.” *Development* 133  
672 (19): 3805–15. <https://doi.org/10.1242/dev.02549>.
- 673 Schulte, J., U. Tepass, and V. J. Auld. 2003. “Gliotactin, a Novel Marker of Tricellular



- 674 Junctions, Is Necessary for Septate Junction Development in *Drosophila*.” *Journal of Cell*  
675 *Biology* 161 (5): 991–1000. <https://doi.org/10.1083/jcb.200303192>.
- 676 Snow, P. M., A. J. Bieber, and C. S. Goodman. 1989. “Fasciclin III: A Novel Homophilic  
677 Adhesion Molecule in *Drosophila*.” *Cell* 59 (2): 313–23. [https://doi.org/10.1016/0092-](https://doi.org/10.1016/0092-8674(89)90293-6)  
678 [8674\(89\)90293-6](https://doi.org/10.1016/0092-8674(89)90293-6).
- 679 Spradling, A. C., M. De Cuevas, D. Drummond-Barbosa, L. Keyes, M. Lilly, M. Pepling, and T.  
680 Xie. 1997. “The *Drosophila* Germarium: Stem Cells, Germ Line Cysts, and Oocytes.” *Cold*  
681 *Spring Harbor Symposia on Quantitative Biology* 62: 25–34.
- 682 Tepass, U., G. Tanentzapf, R. Ward, and R. Fehon. 2001. “Epithelial Cell Polarity and Cell  
683 Junctions in *Drosophila*.” *Annual Review of Genetics* 35: 747–84.  
684 <https://doi.org/10.1146/annurev.genet.35.102401.091415>.
- 685 Tepass, U., and Volker Hartenstein. 1994. “The Development of Cellular Junctions in the  
686 *Drosophila* Embryo.” *Developmental Biology*. <https://doi.org/10.1006/dbio.1994.1054>.
- 687 Tiklová, K., K. A. Senti, S. Wang, A. GräCurrency Signslund, and C. Samakovlis. 2010.  
688 “Epithelial Septate Junction Assembly Relies on Melanotransferrin Iron Binding and  
689 Endocytosis in *Drosophila*.” *Nature Cell Biology* 12 (11): 1071–77.  
690 <https://doi.org/10.1038/ncb2111>.
- 691 VanHook, A., and A. Letsou. 2008. “Head Involution in *Drosophila*: Genetic and Morphogenetic  
692 Connections to Dorsal Closure.” *Developmental Dynamics* 237 (1): 28–38.  
693 <https://doi.org/10.1002/dvdy.21405>.
- 694 Venema, D. R., T. Zeev-Ben-Mordehai, and V. J. Auld. 2004. “Transient Apical Polarization of  
695 Gliotactin and Coracle Is Required for Parallel Alignment of Wing Hairs in *Drosophila*.”  
696 *Developmental Biology* 275 (2): 301–14. <https://doi.org/10.1016/j.ydbio.2004.07.040>.

- 697 Viktorinová, I., T. König, K. Schlichting, and C. Dahmann. 2009. “The Cadherin Fat2 Is  
698 Required for Planar Cell Polarity in the *Drosophila* Ovary.” *Development* 136 (24): 4123–  
699 32. <https://doi.org/10.1242/dev.039099>.
- 700 Ward, R. E., R. S. Lamb, and R. G. Fehon. 1998. “A Conserved Functional Domain of  
701 *Drosophila* Coracle Is Required for Localization at the Septate Junction and Has  
702 Membrane-Organizing Activity.” *Cell* 140 (6): 1463–73.
- 703 Wei, J., M. Hortsch, and S. Goode. 2004. “Neuroglian Stabilizes Epithelial Structure during  
704 *Drosophila* Oogenesis.” *Developmental Dynamics* 230 (4): 800–808.  
705 <https://doi.org/10.1002/dvdy.20108>.
- 706 Wittes, J., and T. Schüpbach. 2018. “A Gene Expression Screen in *Drosophila Melanogaster*  
707 Identifies Novel JAK/STAT and EGFR Targets During Oogenesis.” *G3 & Genes/Genomes/Genetics* 9 (1): 47–60. <https://doi.org/10.1534/g3.118.200786>.
- 709 Wu, V. M., J. Schulte, A. Hirschi, U. Tepass, and G.J. Beitel. 2004. “Sinuous Is a *Drosophila*  
710 Claudin Required for Septate Junction Organization and Epithelial Tube Size Control.”  
711 *Journal of Cell Biology* 164 (2): 313–23. <https://doi.org/10.1083/jcb.200309134>.
- 712 Wu, V. M., M. H. Yu, R. Paik, S. Banerjee, Z. Liang, S. M. Paul, M. A. Bhat, and G. J. Beitel.  
713 2007. “*Drosophila* Varicose, a Member of a New Subgroup of Basolateral MAGUKs, Is  
714 Required for Septate Junctions and Tracheal Morphogenesis.” *Development* 134 (5): 999–  
715 1009. <https://doi.org/10.1242/dev.02785>.

716

717

718 **Figure Legends**

719

720 **Figure 1. Mcr, Cont, Nr<sub>x</sub>-IV, and Cora expression during early stages of oogenesis. (A)**  
721 Diagram of a female *Drosophila* ovariole. Egg chambers are formed in the most anterior region  
722 of the ovariole called the germarium (Germ). Each egg chamber undergoes 14 developmental  
723 stages while connected to each other through stalk cells (SCs) to form a mature stage 14 egg. (B)  
724 Diagram of a stage 8 egg chamber. The egg chamber consists of 15 nurse cells (NCs) and one  
725 oocyte (Oo.), which are surrounded by a monolayer of follicle cells (FCs). At the anterior and  
726 posterior ends of an egg chamber resides a pair of differentiated FCs called polar cells (PCs). (C)  
727 Diagram of a lateral view of a portion of a stage 10B egg chamber. FCs face the germline and  
728 have defined apical-basal polarity with the apical surface facing the germline and a lateral  
729 junctional complex consisting of a marginal zone (MZ), an adherens junction (AJ), and a septate  
730 junction (SJ). (D-G) Confocal optical sections of wild type early stages egg chambers stained  
731 with antibodies against Mcr (D), Cont (E), Nr<sub>x</sub>-IV (F), and Cora (G), and co-stained with  
732 antibodies against Ecad (green) and labeled with DAPI. All four SJ proteins are expressed  
733 throughout the egg chamber along FC membranes, including SCs (arrowheads in B and D, and  
734 data not shown for Nr<sub>x</sub>-IV and Cora) and in the NCs. Mcr, Cont, and Nr<sub>x</sub>-IV (D-F) are found  
735 along the membrane and in puncta, whereas Cora is found predominantly at the membrane (G).  
736 In addition, Mcr, Cont, and Nr<sub>x</sub>-IV are highly expressed in the PCs (asterisks in D-F), whereas  
737 Cora is expressed in these cells with same level of expression relative to the FCs (data not  
738 shown). Note that the focal plane of these images shows strong staining in PCs in only one side  
739 of the egg chamber, but Mcr, Cont and Nr<sub>x</sub>-IV are equally expressed in both anterior and  
740 posterior PCs. Anterior is to the left in each ovariole. Scale bar= 25µm.  
741

742 **Figure 2. Mcr, Cont, NrX-IV, and Cora localization at later stages of oogenesis.** Confocal  
743 optical sections of wild type stage 11 – 12 egg chambers (B, D, F, and H) or stage 14 (C, E, G,  
744 and I) stained with antibodies against Mcr (B and C), Cont (D and E), NrX-IV (F and G), or Cora  
745 (H and I) and co-stained with antibodies against Ecad (green) and labeled with DAPI (blue).  
746 Individual channels for SJ protein staining are shown in (B'-H'). The location of these sections is  
747 shown on the stage 12 egg chamber in (A), and is overlaying the boundary between the oocyte  
748 (Oo.) and nurse cells (NCs). Note that Mcr, Cont, NrX-IV, and Cora become enriched at the  
749 apical-lateral region of FCs membrane (arrow in B, D, F, and H). The expression of all of these  
750 proteins persists in stage 14 egg chambers (C, E, G, and I). Anterior is to the left. Scale bar =  
751 25µm in B, D, F, and H and 100µm in C, E, G, and I.

752  
753 **Figure 3. SJ genes are required for egg elongation.** (A-G) Brightfield photomicrographs of  
754 stage 14 egg chambers. (A) *GRI-GAL4>UAS-GFP*, (B) *GRI-GAL4>UAS-Cont-RNAi*, (C) *GRI-*  
755 *GAL4>UAS-Nrx-IV-RNAi*, (D) *GRI-GAL4>UAS-Mcr-RNAi*, (E) *GRI-GAL4>UAS-Cora-RNAi*,  
756 (F) *GRI-GAL4>UAS-Sinu-RNAi*, and (G) *GRI-GAL4>UAS-Lac-RNAi*. Images in this figure  
757 represent average phenotypes observed in each genotype. (H and I) Quantification of length and  
758 width of stage 14 egg chambers from control and *SJ-RNAi* egg chambers. (J) Quantification of  
759 the aspect ratio of length (orange line in A) to width (yellow line in A) from control and *SJ-RNAi*  
760 stage 14 egg chambers. Note that the aspect ratio of all *SJ-RNAi* expressing egg chambers are  
761 statistically significant from the control egg chambers (unpaired T-test; P<0.0001). (K) Zoomed  
762 in images of *GRI-GAL4>UAS-GFP* and *GRI-GAL4>UAS-Lac-RNAi* stage 14 egg chambers  
763 showing the dorsal appendages (L). In the control, dorsal appendages are formed, whereas the  
764 dorsal appendages in eggs expressing *Lac-RNAi* are either deformed or absent (arrows). (M)

765 Quantification of dorsal appendage defects from control and *SJ-RNAi* stage 14 egg chambers. *n*,  
766 total number of egg chambers measured per genotype. Data represents individual values with  
767 mean  $\pm$  s.d. *P* value <0.0001. Anterior is to the left. Scale bar = 100 $\mu$ m.

768

769 **Figure 4. Mcr expression during border cell migration.** (A) Diagram of border cell migration.

770 At early stage 9 of oogenesis, a group of 4-6 follicle cells are specified by the polar cells (PCs)

771 (green) to become border cells (BCs) (magenta). The BC/PC cluster delaminates apically and

772 migrates between the nurse cells (NCs) until it reaches the oocyte (Oo.) by stage 10 of oogenesis.

773 (B-D) Confocal optical images of wild type stage 9-10 egg chambers stained with antibodies

774 against Mcr (magenta), Fas3 (green), and labeled with DAPI (blue). (B-D) Mcr is expressed in

775 the PCs and BCs with the highest expression at the interface between the PCs and BCs. Mcr is

776 enriched at the leading edge (red arrows in B''-D''). Anterior is to the left. Scale bar = 25 $\mu$ m in

777 (B-D) and 10 $\mu$ m in (B'-B'''' and D'-D'''').

778

779 **Figure 5. Mcr, Cont, NrX-IV, and Cora are required for effective border cell migration.** (A-

780 C) Border cell migration in control egg chambers. Egg chambers are immunostained with anti-

781 Fas3 (magenta) to mark the polar cells, GFP (green) to mark border cells and labeled with DAPI

782 (blue). Arrow indicates a border cell cluster that has completed migration to the oocyte by stage

783 10. (D-F) Stage 10 egg chambers expressing *Cont-RNAi* in border cells immunostained with anti-

784 Cont (magenta) and anti-Fas3 (blue) as examples of BC cluster migration defects in *SJ-RNAi* egg

785 chambers. Failed (arrow in D), incomplete (arrow in E), or disassociated border cell migration

786 (arrow in F). Higher magnification of wild type (G) and *Cont-RNAi*-expressing (H) border cell

787 cluster showing the dissociation of border cell cluster observed in *SJ-RNAi* clusters. (I and J)

788 Quantification of border cell cluster phenotypes at stage 10 egg chambers in control and *SJ-RNAi*  
789 driven by either *Slbo-GAL4* (I) or *C306-GAL4* (J) line. Anterior is to the left. Scale bar = 25 $\mu$ m.

790

791 **Figure 6. The apical-lateral localization of Cora depends on Mcr localization at the apical-**  
792 **lateral membrane.** (A-D) Confocal optical sections of stage 12 follicle cells (FCs) stained with  
793 Mcr (magenta) and Cora (green) and labeled with DAPI (blue). Mcr and Cora co-localize at the  
794 septate junction (SJ) (A), whereas Mcr and Cora localize along the lateral membrane of *NrxIV-*  
795 *RNAi* expressing FCs (B). In *Mcr-RNAi* expressing FCs, Cora localizes laterally (C) or maintains  
796 its enrichment at the apical-lateral membrane (D). Scale bar = 10 $\mu$ m (A-D) and 0.5 $\mu$ m (E and F).

797

798 **Figure 7. Mcr and Cora require Rab5 and Rab11 for their correct localization at the SJ.**

799 While Mcr and Cora co-localize at the apical-lateral membrane of stage 11 FCs (arrows in A-  
800 A''), both Cora and Mcr fail to localize at the SJ in *Rab5<sup>DN</sup>* expressing FCs (B). In stage 12 FCs,  
801 Mcr and Cora co-localize at the apical-lateral membrane (C). (D) In *Rab11-RNAi* expressing  
802 FCs, however, Cora localizes along the lateral membrane, whereas Mcr is either missing  
803 (arrowhead) or localizes along the lateral membrane (arrow). Anterior is to the left. Scale bars =  
804 10 $\mu$ m.

805

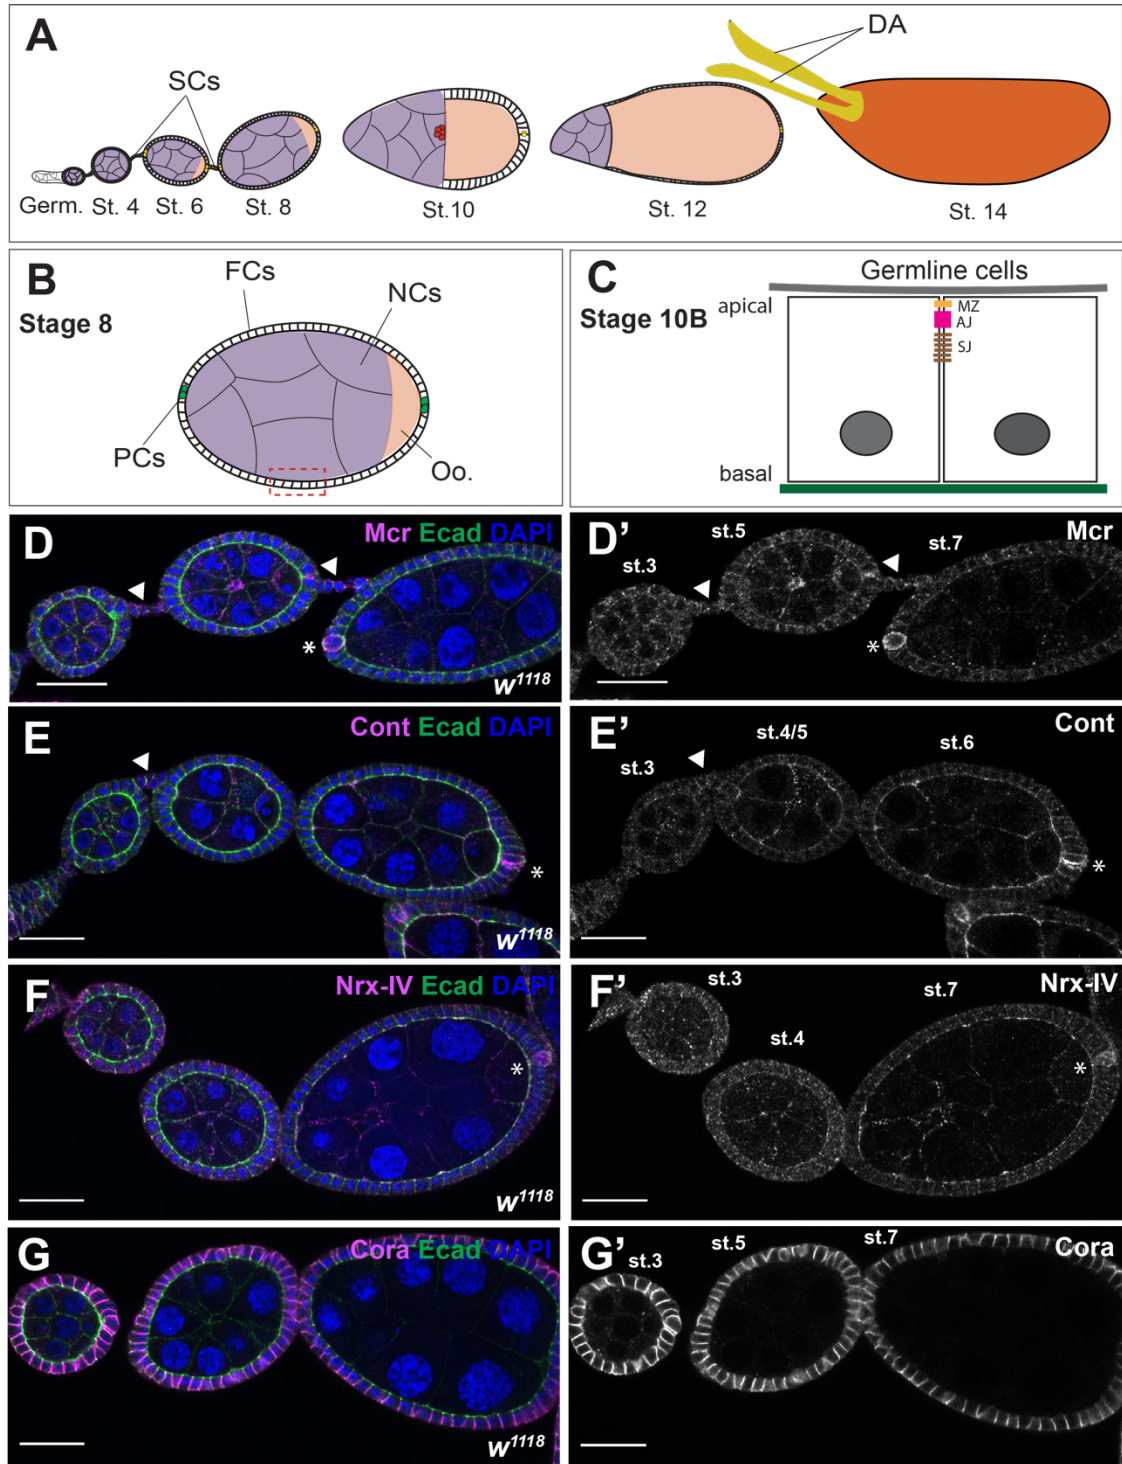

Figure 1.

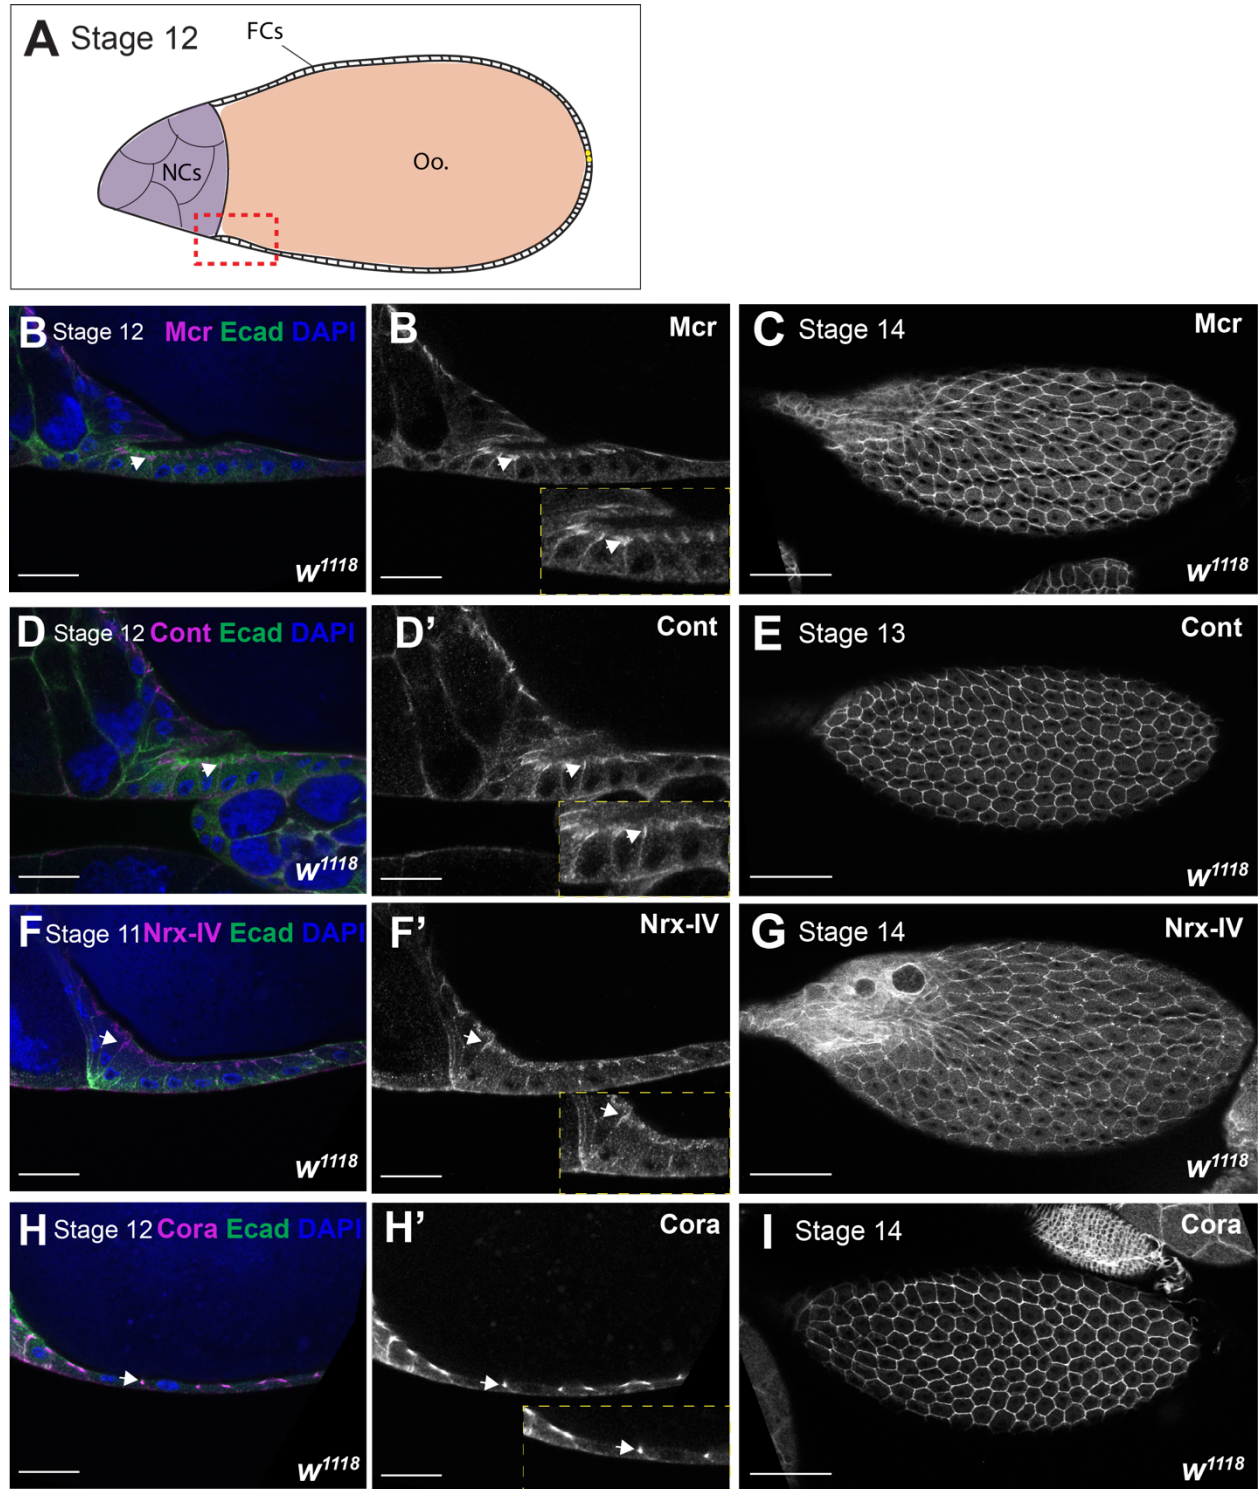

**Figure 2.**



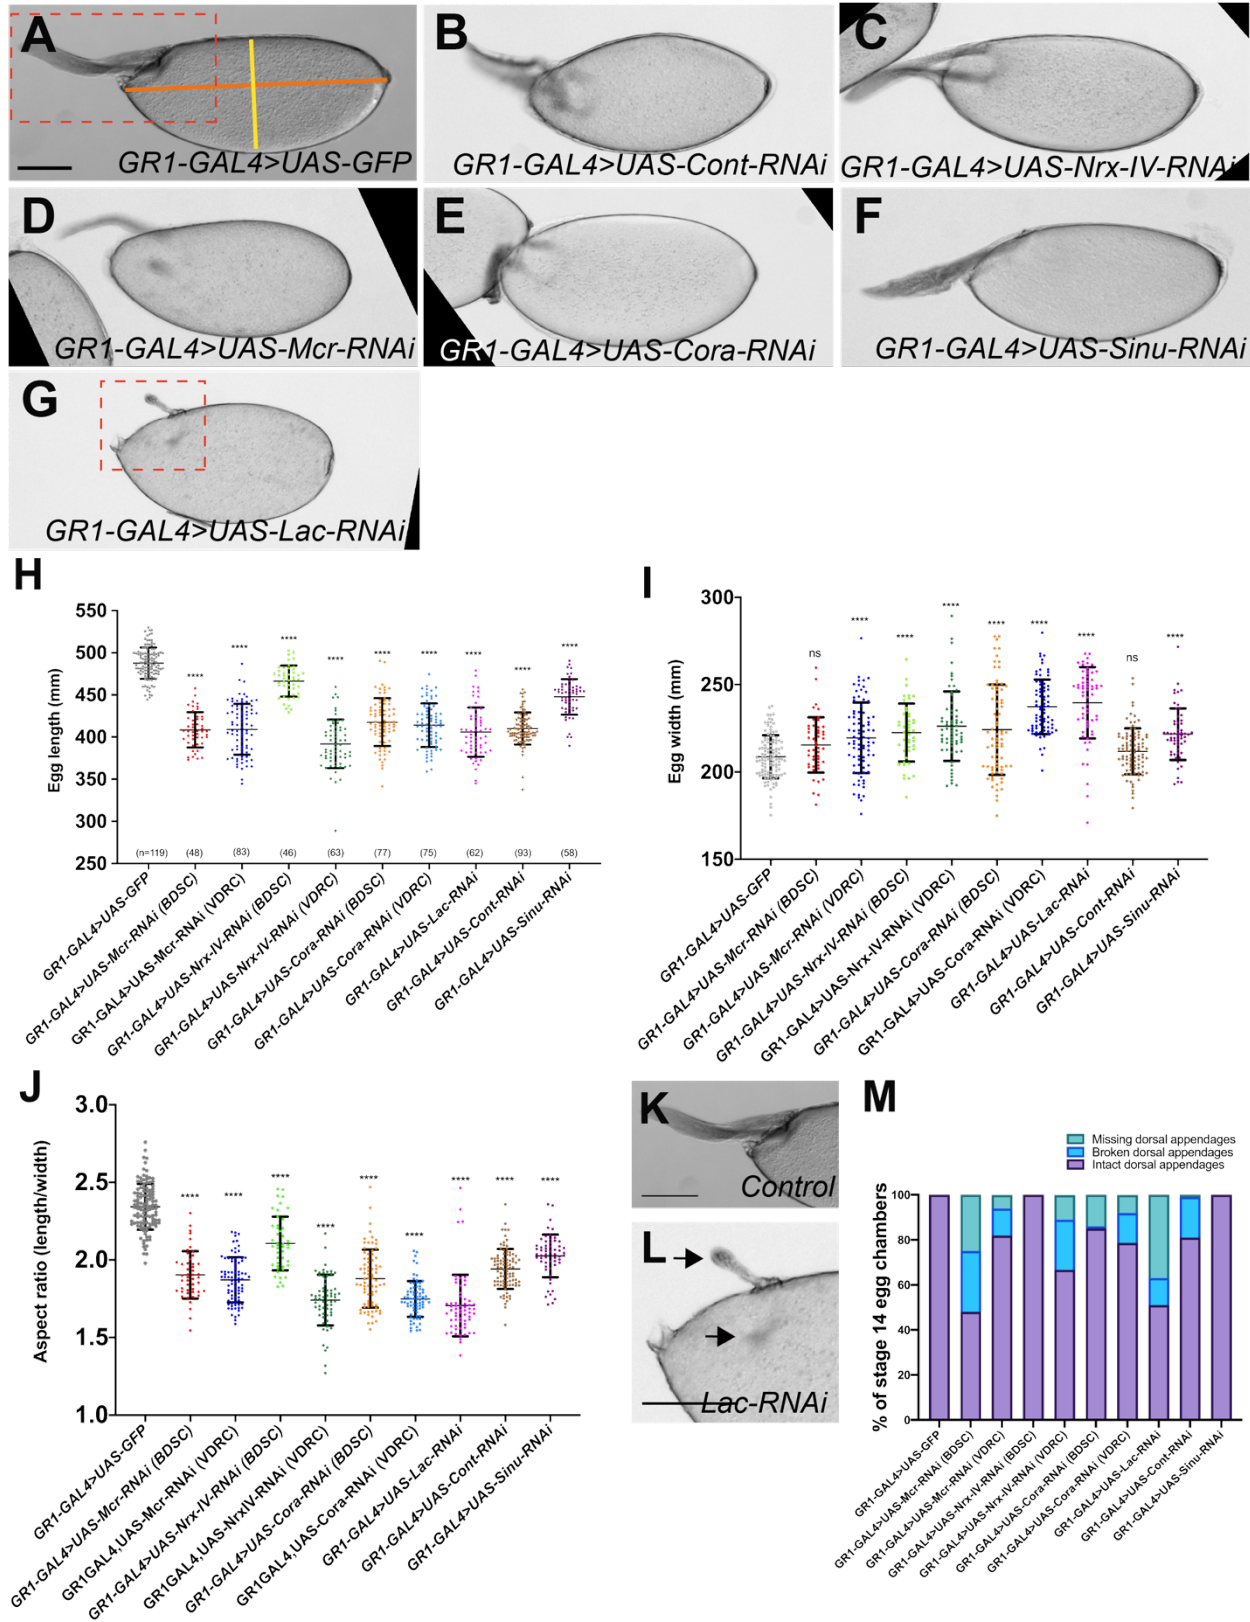

**Figure 3.**

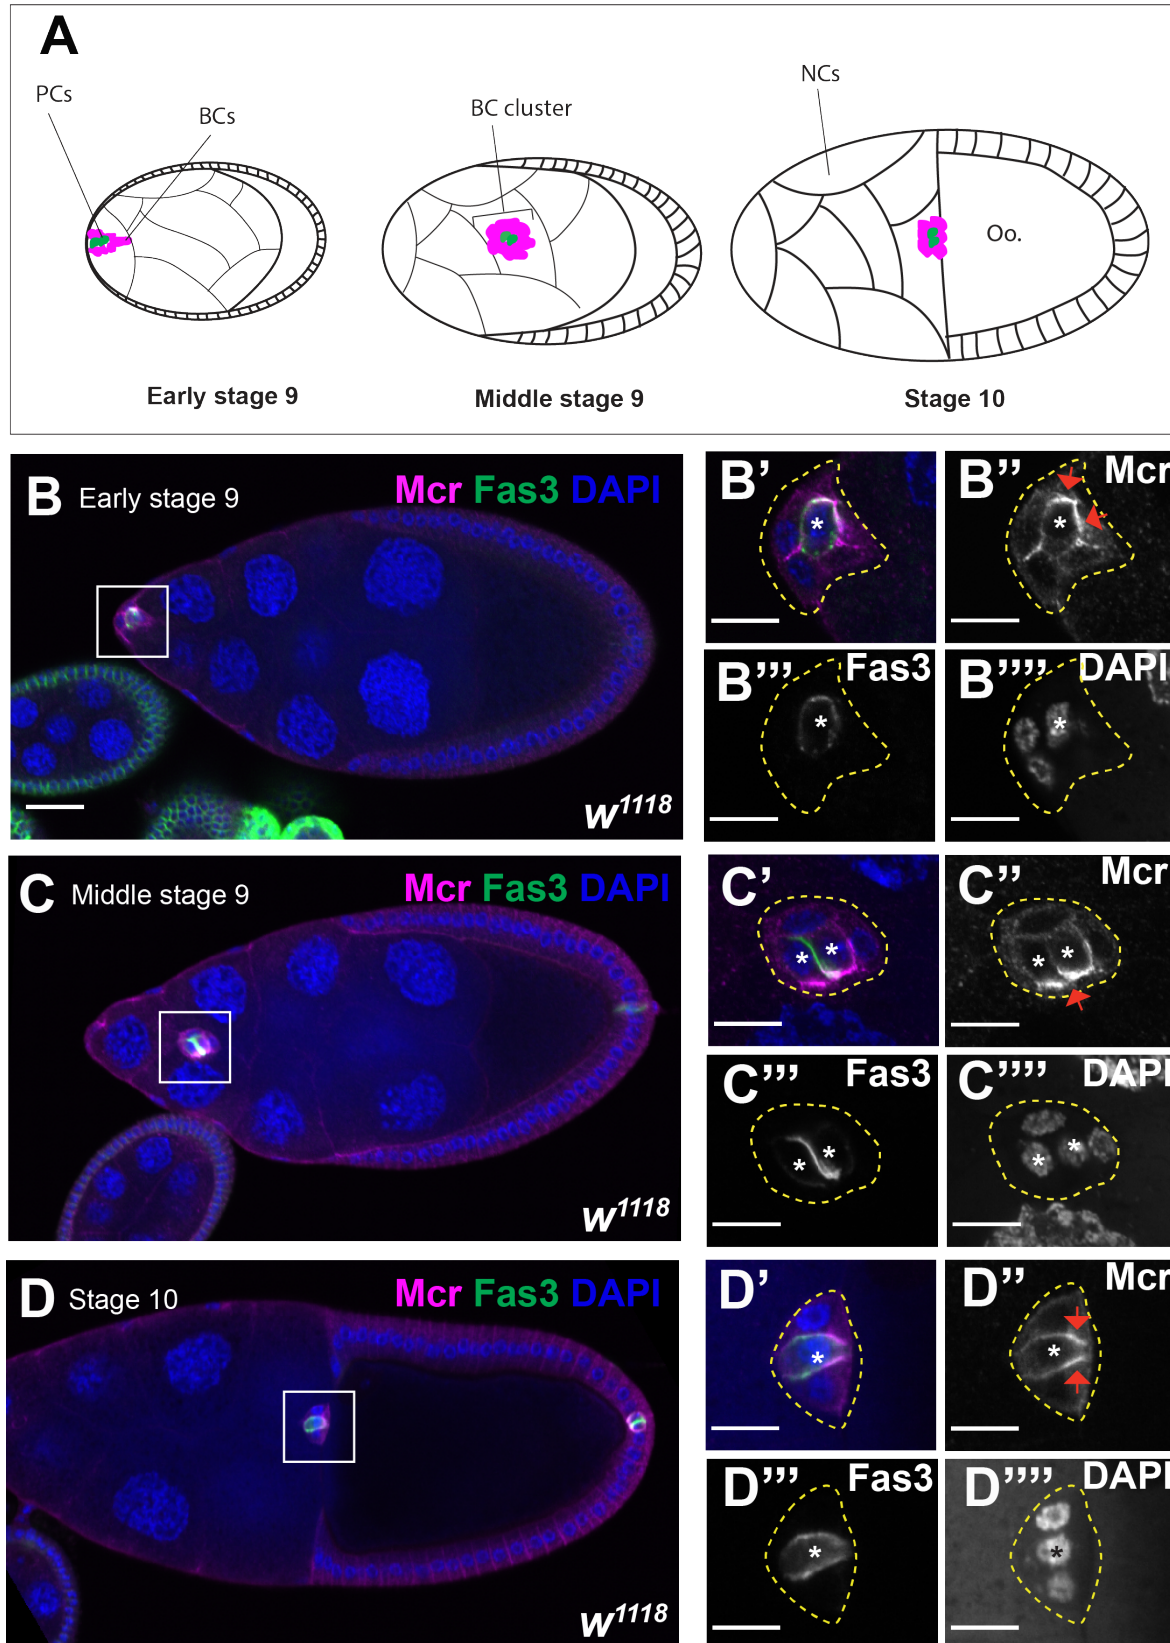

**Figure 4.**

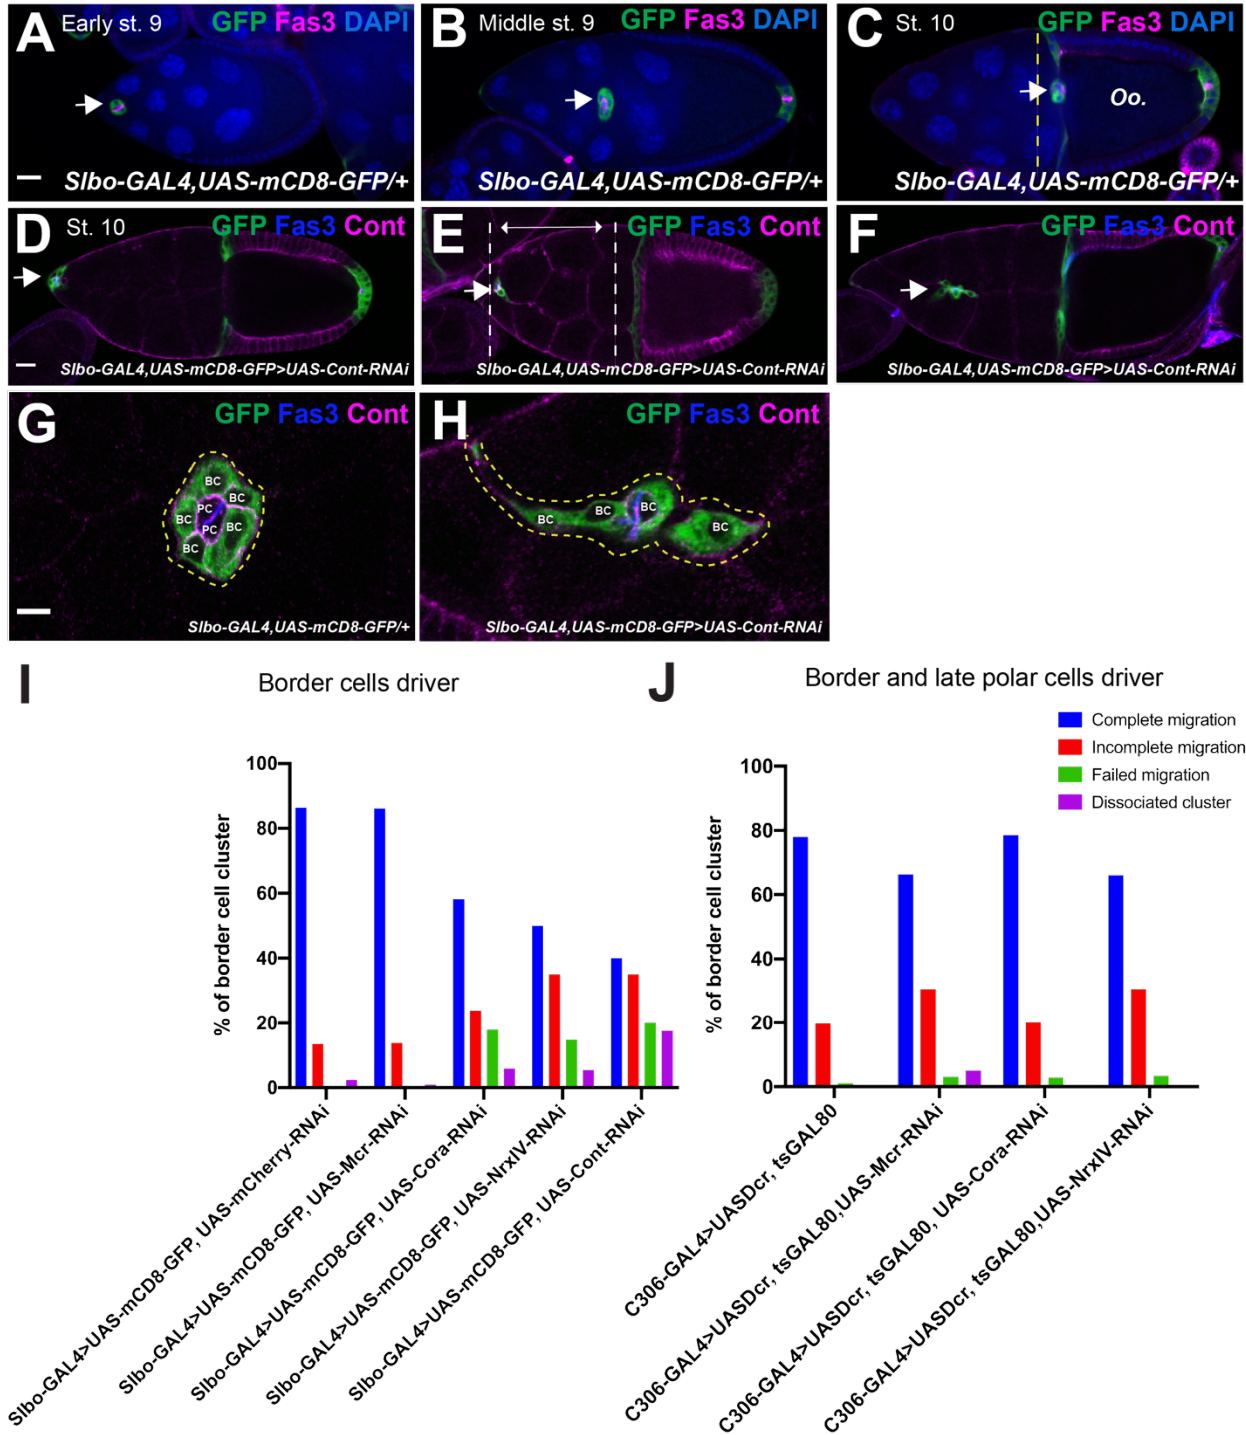

**Figure 5.**

Lorem ipsum

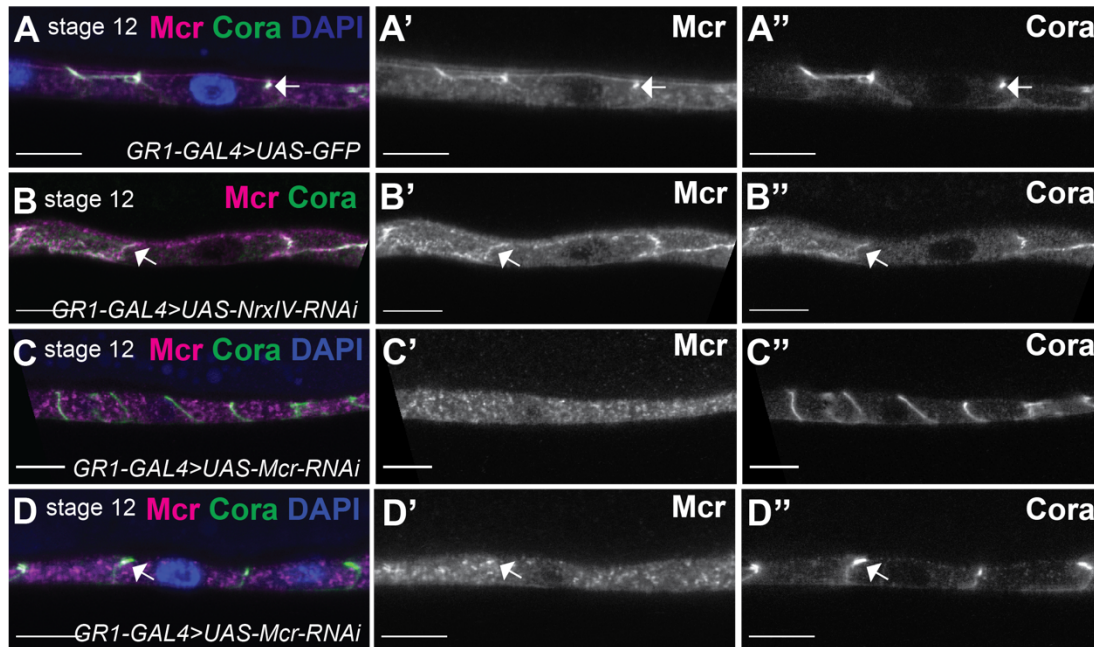

**Figure 6.**

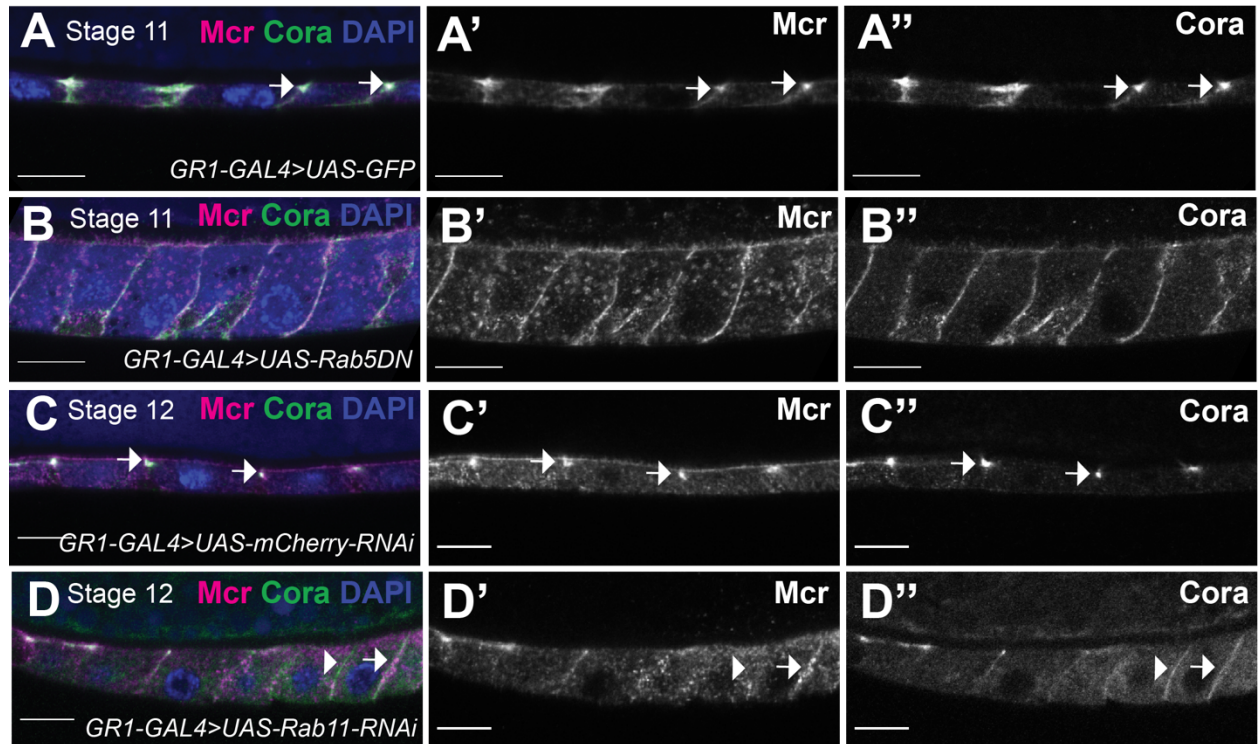

**Figure 7.**
